# Supplementary material for: PharmVIP: A Web-Based Tool for Pharmacogenomic Variant Analysis and Interpretation
Source: MDPI journal article supplement (doi:10.3390/jpm11111230), 2021-11-19

## HLA

Related CPIC guideline(s):

|                             |                                                         |
|-----------------------------|---------------------------------------------------------|
| Gene(s)                     | CYP2C9, HLA-B                                           |
| All possible diplotype(s)   | [*1/*2, Other/Other]                                    |
| # missing variants (CYP2C9) | 0/53                                                    |
| HLA-B                       | Tool(s) detecting Other/Other = ATHLATES,HLA-HD,KOURAMI |

Drug: phenytoin

Diplotype: [\*1/\*2, Other/Other]

|                      |                                                                                                                                                                                                                        |
|----------------------|------------------------------------------------------------------------------------------------------------------------------------------------------------------------------------------------------------------------|
| Implications         | Reduced phenytoin metabolism; higher plasma concentrations will increase probability of toxicities.                                                                                                                    |
| Metabolizers Status  | N/A, N/A                                                                                                                                                                                                               |
| Phenotype (Genotype) | An individual carrying one normal activity allele plus one decreased or no function allele.                                                                                                                            |
| Recommendations      | Consider 25% reduction of recommended starting maintenance dosed (based on patient's clinical characteristics). Subsequent maintenance doses should be adjusted according to therapeutic drug monitoring and response. |
| Guideline strength   | Moderate                                                                                                                                                                                                               |

|                           |                                                         |
|---------------------------|---------------------------------------------------------|
| Gene(s)                   | HLA-A, HLA-B                                            |
| All possible diplotype(s) | [Other/Other, Other/Other]                              |
| HLA-A                     | Tool(s) detecting Other/Other = ATHLATES,HLA-HD,KOURAMI |
| HLA-B                     | Tool(s) detecting Other/Other = ATHLATES,HLA-HD,KOURAMI |

Drug: carbamazepine

Diplotype: [Other/Other, Other/Other]

|                      |                                                                                                                                                                                            |
|----------------------|--------------------------------------------------------------------------------------------------------------------------------------------------------------------------------------------|
| Implications         | Normal or reduced risk of carbamazepine-associated cutaneous adverse reactions                                                                                                             |
| Metabolizers Status  | N/A, N/A                                                                                                                                                                                   |
| Phenotype (Genotype) | "Normal" or reduced risk of carbamazepine-associated cutaneous adverse reactions in the absence of HLA-B*15:02 and HLA-A*31:01 alleles (often reported as "negative" on a genotyping test) |
| Recommendations      | Use carbamazepine per standard dosing guidelines                                                                                                                                           |
| Guideline strength   | <b>Strong</b>                                                                                                                                                                              |

## CONTACT

 National Biobank of Thailand (NBT)

 Tel : 025647000 Ext. 71475

 Email : nbt@nstda.or.th
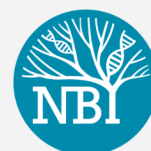

|                           |                                                         |
|---------------------------|---------------------------------------------------------|
| Gene(s)                   | HLA-B                                                   |
| All possible diplotype(s) | Other/Other                                             |
| HLA-B                     | Tool(s) detecting Other/Other = ATHLATES,HLA-HD,KOURAMI |

**Drug: abacavir****Diplotype: Other/Other**

|                      |                                                                                                                                     |
|----------------------|-------------------------------------------------------------------------------------------------------------------------------------|
| Implications         | Low or reduced risk of abacavir hypersensitivity                                                                                    |
| Metabolizers Status  | N/A                                                                                                                                 |
| Phenotype (Genotype) | Very low risk of hypersensitivity (~94% of patients) in the absence of *57:01 alleles (reported as "negative" on a genotyping test) |
| Recommendations      | Use abacavir per standard dosing guidelines                                                                                         |
| Guideline strength   | <b>Strong</b>                                                                                                                       |

**Drug: allopurinol****Diplotype: Other/Other**

|                      |                                                                                                                   |
|----------------------|-------------------------------------------------------------------------------------------------------------------|
| Implications         | Low or reduced risk of allopurinol-induced SCAR                                                                   |
| Metabolizers Status  | N/A                                                                                                               |
| Phenotype (Genotype) | Low or reduced risk of allopurinol SCAR (absence of *58:01 alleles (reported as "negative" on a genotyping test)) |
| Recommendations      | Use allopurinol per standard dosing guidelines.                                                                   |
| Guideline strength   | <b>Strong</b>                                                                                                     |

**Drug: oxcarbazepine****Diplotype: Other/Other**

|                      |                                                                                                                                                                            |
|----------------------|----------------------------------------------------------------------------------------------------------------------------------------------------------------------------|
| Implications         | Normal or reduced risk of oxcarbazepine-associated cutaneous adverse reactions                                                                                             |
| Metabolizers Status  | N/A                                                                                                                                                                        |
| Phenotype (Genotype) | "Normal" or reduced risk of oxcarbazepine-associated cutaneous adverse reactions in the absence of HLA-B*15:02 alleles (often reported as "negative" on a genotyping test) |
| Recommendations      | Use oxcarbazepine per standard dosing guidelines                                                                                                                           |
| Guideline strength   | <b>Strong</b>                                                                                                                                                              |

**CONTACT**

 National Biobank of Thailand (NBT)

 Tel : 025647000 Ext. 71475

 Email : nbt@nstda.or.th

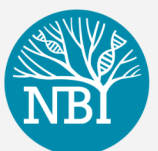

## Related publication(s) for HLA-ADR association:

## HLA-A\*01 (No. of detecting tools = 3/3)

| ADR | Cohort ethnicity | Patient disease | p-value<br>Patients and<br>drug exposed<br>controls | Odds ratio<br>(95%<br>confidence<br>intervals)<br>Patients and<br>drug<br>exposed<br>controls | p-value<br>Patients and<br>population<br>controls | Odds ratio<br>(95%<br>confidence<br>intervals)<br>Patients<br>and<br>population | Patient -<br>carrier/allele<br>frequency | Drug<br>Exposed<br>Controls -<br>carrier/allele<br>frequency | Population<br>Controls -<br>carrier/allele<br>frequency | PMID |
|-----|------------------|-----------------|-----------------------------------------------------|-----------------------------------------------------------------------------------------------|---------------------------------------------------|---------------------------------------------------------------------------------|------------------------------------------|--------------------------------------------------------------|---------------------------------------------------------|------|
|-----|------------------|-----------------|-----------------------------------------------------|-----------------------------------------------------------------------------------------------|---------------------------------------------------|---------------------------------------------------------------------------------|------------------------------------------|--------------------------------------------------------------|---------------------------------------------------------|------|

## Clozapine : 1 publication(s)

|                 |           |               |  |  |  |  |        |         |  |                          |
|-----------------|-----------|---------------|--|--|--|--|--------|---------|--|--------------------------|
| agranulocytosis | Caucasian | Schizophrenia |  |  |  |  | 7 / 31 | 17 / 77 |  | <a href="#">11266078</a> |
|-----------------|-----------|---------------|--|--|--|--|--------|---------|--|--------------------------|

## HLA-A\*01:01 (No. of detecting tools = 3/3)

| ADR | Cohort ethnicity | Patient disease | p-value<br>Patients and<br>drug exposed<br>controls | Odds ratio<br>(95%<br>confidence<br>intervals)<br>Patients and<br>drug<br>exposed<br>controls | p-value<br>Patients and<br>population<br>controls | Odds ratio<br>(95%<br>confidence<br>intervals)<br>Patients<br>and<br>population | Patient -<br>carrier/allele<br>frequency | Drug<br>Exposed<br>Controls -<br>carrier/allele<br>frequency | Population<br>Controls -<br>carrier/allele<br>frequency | PMID |
|-----|------------------|-----------------|-----------------------------------------------------|-----------------------------------------------------------------------------------------------|---------------------------------------------------|---------------------------------------------------------------------------------|------------------------------------------|--------------------------------------------------------------|---------------------------------------------------------|------|
|-----|------------------|-----------------|-----------------------------------------------------|-----------------------------------------------------------------------------------------------|---------------------------------------------------|---------------------------------------------------------------------------------|------------------------------------------|--------------------------------------------------------------|---------------------------------------------------------|------|

## Amoxicillin-clavulanate : 2 publication(s)

|                                  |           |                      |  |  |   |      |          |  |          |                          |
|----------------------------------|-----------|----------------------|--|--|---|------|----------|--|----------|--------------------------|
| drug induced liver injury (DILI) | Caucasian | Bacterial infections |  |  | 1 | 0.76 | 35 / 134 |  | 37 / 107 | <a href="#">21570397</a> |
| drug induced liver injury (DILI) | Caucasian | Bacterial infections |  |  | 1 | 0.38 | 3 / 134  |  | 21 / 107 | <a href="#">21570397</a> |

## Antibacterial drugs : 2 publication(s)

|                                                                                                                                                                 |         |                      |  |  |  |  |        |  |        |                          |
|-----------------------------------------------------------------------------------------------------------------------------------------------------------------|---------|----------------------|--|--|--|--|--------|--|--------|--------------------------|
| Stevens-Johnson syndrome (SJS),toxic epidermal necrolysis (TEN),drug-induced hypersensitivity syndrome (DIHS),acute generalized exanthematous pustulosis (AGEP) | Unknown | Bacterial infections |  |  |  |  | 3 / 24 |  | 7 / 80 | <a href="#">31089385</a> |
| Stevens-Johnson syndrome (SJS),toxic epidermal necrolysis (TEN),drug-induced hypersensitivity syndrome (DIHS),acute generalized exanthematous pustulosis (AGEP) | Unknown | Bacterial infections |  |  |  |  | 2 / 20 |  | 7 / 80 | <a href="#">31089385</a> |

## Antiepileptic drugs : 2 publication(s)

|                                                                                                                                                                 |             |          |       |                       |  |  |        |        |        |                          |
|-----------------------------------------------------------------------------------------------------------------------------------------------------------------|-------------|----------|-------|-----------------------|--|--|--------|--------|--------|--------------------------|
| Stevens-Johnson syndrome (SJS),toxic epidermal necrolysis (TEN)                                                                                                 | Han Chinese | Epilepsy | 0.308 | 5.444 (0.311 - 95.21) |  |  | 1 / 10 | 1 / 50 |        | <a href="#">24856347</a> |
| Stevens-Johnson syndrome (SJS),toxic epidermal necrolysis (TEN),drug-induced hypersensitivity syndrome (DIHS),acute generalized exanthematous pustulosis (AGEP) | Unknown     | Epilepsy |       |                       |  |  | 5 / 34 |        | 7 / 80 | <a href="#">31089385</a> |

## Carbamazepine : 5 publication(s)

|                                                                                                               |             |          |      |                      |      |                     |        |         |         |                          |
|---------------------------------------------------------------------------------------------------------------|-------------|----------|------|----------------------|------|---------------------|--------|---------|---------|--------------------------|
| Stevens-Johnson syndrome (SJS),toxic epidermal necrolysis (TEN),drug-induced hypersensitivity syndrome (DIHS) | Japanese    | Epilepsy |      |                      |      |                     | 0 / 61 | 6 / 376 |         | <a href="#">21149285</a> |
| Stevens-Johnson syndrome (SJS),toxic epidermal necrolysis (TEN)                                               | Han Chinese | Epilepsy | 0.33 | 6.14 (0.24 - 155.12) | 0.21 | 5.65 (0.57 - 55.86) | 1 / 36 | 0 / 64  | 3 / 528 | <a href="#">22348435</a> |

## CONTACT

 National Biobank of Thailand (NBT)

 Tel : 025647000 Ext. 71475

 Email : [nbt@nstda.or.th](mailto:nbt@nstda.or.th)

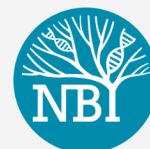

**Carbamazepine : 5 publication(s)**

|                                                                 |             |          |   |                     |       |                 |         |        |             |                          |
|-----------------------------------------------------------------|-------------|----------|---|---------------------|-------|-----------------|---------|--------|-------------|--------------------------|
| Stevens-Johnson syndrome (SJS),toxic epidermal necrolysis (TEN) | Han Chinese | Epilepsy | 1 | 3.13 (0.12 - 80.69) |       |                 | 1 / 24  | 0 / 24 |             | <a href="#">22348435</a> |
| Stevens-Johnson syndrome (SJS),toxic epidermal necrolysis (TEN) | European    | Epilepsy |   |                     | 0.503 | 2.2 (1.1 - 4.7) | 14 / 28 |        | 2731 / 8862 | <a href="#">30972788</a> |
| Stevens-Johnson syndrome (SJS),toxic epidermal necrolysis (TEN) | European    | Epilepsy |   |                     | 0.06  | 3.3 (1.5 - 7)   | 14 / 28 |        | 124 / 529   | <a href="#">30972788</a> |

**EGF receptor inhibitors : 1 publication(s)**

|                               |         |        |        |                       |  |  |        |          |  |                          |
|-------------------------------|---------|--------|--------|-----------------------|--|--|--------|----------|--|--------------------------|
| maculopapular exanthema (MPE) | Unknown | Cancer | 0.4008 | 1.446 (0.472 - 4.428) |  |  | 4 / 38 | 25 / 172 |  | <a href="#">23057547</a> |
|-------------------------------|---------|--------|--------|-----------------------|--|--|--------|----------|--|--------------------------|

**Lamotrigine : 2 publication(s)**

|                                                                 |           |          |   |                  |       |                     |       |        |          |                          |
|-----------------------------------------------------------------|-----------|----------|---|------------------|-------|---------------------|-------|--------|----------|--------------------------|
| Stevens-Johnson syndrome (SJS),toxic epidermal necrolysis (TEN) | Caucasian | Epilepsy | 1 | 2 (0.04 - 78.77) | 0.976 | 2.03 (0.07 - 29.33) | 1 / 3 | 2 / 10 | 50 / 253 | <a href="#">27888155</a> |
| drug-induced hypersensitivity syndrome (DIHS)                   | Caucasian | Epilepsy | 1 | 2 (0.04 - 78.77) | 1     | 2.03 (0.07 - 29.33) | 1 / 3 | 2 / 10 | 50 / 253 | <a href="#">27888155</a> |

**Levetiracetam : 1 publication(s)**

|                              |        |          |   |                     |  |  |        |        |  |                          |
|------------------------------|--------|----------|---|---------------------|--|--|--------|--------|--|--------------------------|
| maculopapular eruption (MPE) | Indian | Epilepsy | 1 | 0.58 (0.02 - 13.05) |  |  | 0 / 10 | 3 / 50 |  | <a href="#">28101480</a> |
|------------------------------|--------|----------|---|---------------------|--|--|--------|--------|--|--------------------------|

**NSAID and 'multi-ingredient cold medication' : 1 publication(s)**

|                                                                                             |         |             |  |  |      |  |        |  |          |                          |
|---------------------------------------------------------------------------------------------|---------|-------------|--|--|------|--|--------|--|----------|--------------------------|
| Stevens-Johnson syndrome (SJS),toxic epidermal necrolysis (TEN),severe ocular complications | Diverse | Common cold |  |  | 0.17 |  | 2 / 39 |  | 20 / 133 | <a href="#">28278336</a> |
|---------------------------------------------------------------------------------------------|---------|-------------|--|--|------|--|--------|--|----------|--------------------------|

**HLA-A\*11 (No. of detecting tools = 3/3)**

| ADR | Cohort ethnicity | Patient disease | p-value Patients and drug exposed controls | Odds ratio (95% confidence intervals) Patients and drug exposed controls | p-value Patients and population controls | Odds ratio (95% confidence intervals) Patients and population | Patient - carrier/allele frequency | Drug Exposed Controls - carrier/allele frequency | Population Controls - carrier/allele frequency | PMID |
|-----|------------------|-----------------|--------------------------------------------|--------------------------------------------------------------------------|------------------------------------------|---------------------------------------------------------------|------------------------------------|--------------------------------------------------|------------------------------------------------|------|
|-----|------------------|-----------------|--------------------------------------------|--------------------------------------------------------------------------|------------------------------------------|---------------------------------------------------------------|------------------------------------|--------------------------------------------------|------------------------------------------------|------|

**Tetanus antitoxin : 1 publication(s)**

|                              |             |         |  |  |      |                    |        |       |           |                          |
|------------------------------|-------------|---------|--|--|------|--------------------|--------|-------|-----------|--------------------------|
| maculopapular eruption (MPE) | Han Chinese | Tetanus |  |  | 0.12 | 0.24 (0.07 - 0.89) | 3 / 15 | / 118 | 143 / 283 | <a href="#">27749688</a> |
|------------------------------|-------------|---------|--|--|------|--------------------|--------|-------|-----------|--------------------------|

**HLA-A\*11:01 (No. of detecting tools = 2/3)**

| ADR | Cohort ethnicity | Patient disease | p-value Patients and drug exposed controls | Odds ratio (95% confidence intervals) Patients and drug exposed controls | p-value Patients and population controls | Odds ratio (95% confidence intervals) Patients and population | Patient - carrier/allele frequency | Drug Exposed Controls - carrier/allele frequency | Population Controls - carrier/allele frequency | PMID |
|-----|------------------|-----------------|--------------------------------------------|--------------------------------------------------------------------------|------------------------------------------|---------------------------------------------------------------|------------------------------------|--------------------------------------------------|------------------------------------------------|------|
|-----|------------------|-----------------|--------------------------------------------|--------------------------------------------------------------------------|------------------------------------------|---------------------------------------------------------------|------------------------------------|--------------------------------------------------|------------------------------------------------|------|

**Amoxicillin-clavulanate : 2 publication(s)**

|                                  |           |                      |  |  |         |      |         |  |          |                          |
|----------------------------------|-----------|----------------------|--|--|---------|------|---------|--|----------|--------------------------|
| drug induced liver injury (DILI) | Caucasian | Bacterial infections |  |  | 0.26396 | 0.33 | 8 / 134 |  | 19 / 107 | <a href="#">21570397</a> |
| drug induced liver injury (DILI) | Caucasian | Bacterial infections |  |  | 1       | 0.97 | 4 / 48  |  | 11 / 121 | <a href="#">21570397</a> |

**CONTACT**

 National Biobank of Thailand (NBT)

 Tel : 025647000 Ext. 71475

 Email : nbt@nstda.or.th

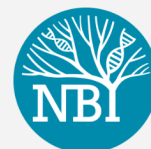

**Antibacterial drugs : 2 publication(s)**

|                                                                                                                                                                 |         |                      |      |  |  |        |         |                          |
|-----------------------------------------------------------------------------------------------------------------------------------------------------------------|---------|----------------------|------|--|--|--------|---------|--------------------------|
| Stevens–Johnson syndrome (SJS),toxic epidermal necrolysis (TEN),drug-induced hypersensitivity syndrome (DIHS),acute generalized exanthematous pustulosis (AGEP) | Unknown | Bacterial infections | 0.02 |  |  | 0 / 24 | 16 / 80 | <a href="#">31089385</a> |
| Stevens–Johnson syndrome (SJS),toxic epidermal necrolysis (TEN),drug-induced hypersensitivity syndrome (DIHS),acute generalized exanthematous pustulosis (AGEP) | Unknown | Bacterial infections |      |  |  | 1 / 20 | 16 / 80 | <a href="#">31089385</a> |

**Antiepileptic drugs : 1 publication(s)**

|                                                                                                                                                                 |         |          |       |  |  |        |         |                          |
|-----------------------------------------------------------------------------------------------------------------------------------------------------------------|---------|----------|-------|--|--|--------|---------|--------------------------|
| Stevens–Johnson syndrome (SJS),toxic epidermal necrolysis (TEN),drug-induced hypersensitivity syndrome (DIHS),acute generalized exanthematous pustulosis (AGEP) | Unknown | Epilepsy | 0.003 |  |  | 0 / 34 | 16 / 80 | <a href="#">31089385</a> |
|-----------------------------------------------------------------------------------------------------------------------------------------------------------------|---------|----------|-------|--|--|--------|---------|--------------------------|

**Carbamazepine : 11 publication(s)**

|                                                                                                               |             |          |       |                         |       |                       |          |          |           |                          |
|---------------------------------------------------------------------------------------------------------------|-------------|----------|-------|-------------------------|-------|-----------------------|----------|----------|-----------|--------------------------|
| Stevens-Johnson syndrome (SJS),toxic epidermal necrolysis (TEN)                                               | Han Chinese | Epilepsy |       | 0.1 (0.05 - 0.2)        |       |                       | 13 / 112 | 83 / 152 |           | <a href="#">24268988</a> |
| drug-induced hypersensitivity syndrome (DIHS)                                                                 | Han Chinese | Epilepsy |       | 1.9 (0.7 - 4.9)         |       |                       | 16 / 23  | 83 / 152 |           | <a href="#">24268988</a> |
| maculopapular exanthema (MPE)                                                                                 | Han Chinese | Epilepsy |       | 0.74 (0.4 - 1.4)        |       |                       | 24 / 51  | 83 / 152 |           | <a href="#">24268988</a> |
| Stevens-Johnson syndrome (SJS),toxic epidermal necrolysis (TEN)                                               | Han Chinese | Epilepsy |       | 2.68 (1.4 - 5.1)        |       |                       | 42 / 60  | 67 / 144 |           | <a href="#">16538176</a> |
| drug-induced hypersensitivity syndrome (DIHS)                                                                 | Han Chinese | Epilepsy |       | 0.99 (0.3 - 3)          |       |                       | 6 / 13   | 67 / 144 |           | <a href="#">16538176</a> |
| maculopapular exanthema (MPE)                                                                                 | Han Chinese | Epilepsy |       | 0.58 (0.2 - 1.6)        |       |                       | 6 / 18   | 67 / 144 |           | <a href="#">16538176</a> |
| maculopapular exanthema (MPE)                                                                                 | Han Chinese | Epilepsy | 0.931 |                         | 0.769 |                       | 22 / 40  | 28 / 52  | 37 / 72   | <a href="#">23830818</a> |
| Stevens-Johnson syndrome (SJS),toxic epidermal necrolysis (TEN),drug-induced hypersensitivity syndrome (DIHS) | Japanese    | Epilepsy |       |                         |       |                       | 7 / 61   | 68 / 376 |           | <a href="#">21149285</a> |
| Stevens-Johnson syndrome (SJS),toxic epidermal necrolysis (TEN)                                               | Han Chinese | Epilepsy | 0.54  | 0.75 (0.3 - 1.89)       | 0.86  | 1.07 (0.49 - 2.38)    | 9 / 36   | 22 / 64  | 141 / 528 | <a href="#">22348435</a> |
| Stevens-Johnson syndrome (SJS),toxic epidermal necrolysis (TEN)                                               | Han Chinese | Epilepsy | 0.38  | 0.6 (0.19 - 1.9)        |       |                       | 9 / 24   | 12 / 24  |           | <a href="#">22348435</a> |
| Stevens-Johnson syndrome (SJS),toxic epidermal necrolysis (TEN)                                               | Caucasian   | Epilepsy | 0.002 | 63.89 (2.46 - 45610000) | 0.007 | 28.29 (1.42 - 180.77) | 2 / 2    | 4 / 23   | 38 / 253  | <a href="#">27888155</a> |

**Clarithromycin : 1 publication(s)**

|                                   |             |                      |      |                     |      |                    |        |        |           |                          |
|-----------------------------------|-------------|----------------------|------|---------------------|------|--------------------|--------|--------|-----------|--------------------------|
| drug-induced skin reaction (DISI) | Han Chinese | Bacterial infections | 0.38 | 4.55 (1.13 - 18.35) | 7.22 | 1.47 (0.46 - 4.75) | 7 / 12 | 8 / 34 | 138 / 283 | <a href="#">29575644</a> |
|-----------------------------------|-------------|----------------------|------|---------------------|------|--------------------|--------|--------|-----------|--------------------------|

**Lamotrigine : 2 publication(s)**

|                                                                 |             |          |       |                        |       |                    |         |         |          |                          |
|-----------------------------------------------------------------|-------------|----------|-------|------------------------|-------|--------------------|---------|---------|----------|--------------------------|
| maculopapular exanthema (MPE)                                   | Han Chinese | Epilepsy | 0.52  |                        | 0.538 |                    | 19 / 43 | 16 / 44 | 37 / 72  | <a href="#">23830818</a> |
| Stevens–Johnson syndrome (SJS),toxic epidermal necrolysis (TEN) | Caucasian   | Epilepsy | 0.395 | 10.5 (0.12 - 11530000) | 0.784 | 2.83 (0.1 - 41.29) | 1 / 3   | 0 / 10  | 38 / 253 | <a href="#">27888155</a> |

**Levetiracetam : 1 publication(s)**

|                              |        |          |      |                    |  |  |        |         |                          |
|------------------------------|--------|----------|------|--------------------|--|--|--------|---------|--------------------------|
| maculopapular eruption (MPE) | Indian | Epilepsy | 0.33 | 0.23 (0.02 - 2.36) |  |  | 1 / 10 | 13 / 50 | <a href="#">28101480</a> |
|------------------------------|--------|----------|------|--------------------|--|--|--------|---------|--------------------------|

**CONTACT**

 National Biobank of Thailand (NBT)

 Tel : 025647000 Ext. 71475

 Email : nbt@nstda.or.th



**NSAID and 'multi-ingredient cold medication' : 1 publication(s)**

|                                                                                             |         |             |  |         |                         |        |  |          |                          |
|---------------------------------------------------------------------------------------------|---------|-------------|--|---------|-------------------------|--------|--|----------|--------------------------|
| Stevens-Johnson syndrome (SJS),toxic epidermal necrolysis (TEN),severe ocular complications | Diverse | Common cold |  | 0.00791 | 0.0743 (0.00438 - 1.26) | 0 / 39 |  | 19 / 133 | <a href="#">28278336</a> |
|---------------------------------------------------------------------------------------------|---------|-------------|--|---------|-------------------------|--------|--|----------|--------------------------|

**Phenytoin : 2 publication(s)**

|                                                                 |             |          |        |                     |   |                    |          |        |                          |                          |
|-----------------------------------------------------------------|-------------|----------|--------|---------------------|---|--------------------|----------|--------|--------------------------|--------------------------|
| Stevens-Johnson syndrome (SJS),toxic epidermal necrolysis (TEN) | Han Chinese | Epilepsy | 0.3856 | 1.5 (0.6 - 3.6)     |   | 14 / 26            | 49 / 113 |        | <a href="#">20235791</a> |                          |
| Stevens-Johnson syndrome (SJS),toxic epidermal necrolysis (TEN) | Caucasian   | Epilepsy | 1      | 1.04 (0.04 - 14.68) | 1 | 0.71 (0.03 - 5.85) | 1 / 2    | 3 / 28 | 38 / 253                 | <a href="#">27888155</a> |

**Tetanus antitoxin : 1 publication(s)**

|                              |             |         |  |      |                    |        |       |           |                          |
|------------------------------|-------------|---------|--|------|--------------------|--------|-------|-----------|--------------------------|
| maculopapular eruption (MPE) | Han Chinese | Tetanus |  | 0.21 | 0.26 (0.07 - 0.95) | 3 / 15 | / 118 | 138 / 283 | <a href="#">27749688</a> |
|------------------------------|-------------|---------|--|------|--------------------|--------|-------|-----------|--------------------------|

**HLA-B\*08:01 (No. of detecting tools = 3/3)**

| ADR | Cohort ethnicity | Patient disease | p-value Patients and drug exposed controls | Odds ratio (95% confidence intervals) Patients and drug exposed controls | p-value Patients and population controls | Odds ratio (95% confidence intervals) Patients and population | Patient - carrier/allele frequency | Drug Exposed Controls - carrier/allele frequency | Population Controls - carrier/allele frequency | PMID |
|-----|------------------|-----------------|--------------------------------------------|--------------------------------------------------------------------------|------------------------------------------|---------------------------------------------------------------|------------------------------------|--------------------------------------------------|------------------------------------------------|------|
|-----|------------------|-----------------|--------------------------------------------|--------------------------------------------------------------------------|------------------------------------------|---------------------------------------------------------------|------------------------------------|--------------------------------------------------|------------------------------------------------|------|

**Amoxicillin-clavulanate : 2 publication(s)**

|                                  |           |                      |  |  |   |      |          |  |          |                          |
|----------------------------------|-----------|----------------------|--|--|---|------|----------|--|----------|--------------------------|
| drug induced liver injury (DILI) | Caucasian | Bacterial infections |  |  | 1 | 0.68 | 28 / 134 |  | 31 / 107 | <a href="#">21570397</a> |
| drug induced liver injury (DILI) | Caucasian | Bacterial infections |  |  | 1 | 0.49 | 3 / 48   |  | 16 / 121 | <a href="#">21570397</a> |

**Antibacterial drugs : 2 publication(s)**

|                                                                                                                                                                 |         |                      |  |  |  |  |        |  |        |                          |
|-----------------------------------------------------------------------------------------------------------------------------------------------------------------|---------|----------------------|--|--|--|--|--------|--|--------|--------------------------|
| Stevens-Johnson syndrome (SJS),toxic epidermal necrolysis (TEN),drug-induced hypersensitivity syndrome (DIHS),acute generalized exanthematous pustulosis (AGEP) | Unknown | Bacterial infections |  |  |  |  | 0 / 24 |  | 2 / 80 | <a href="#">31089385</a> |
| Stevens-Johnson syndrome (SJS),toxic epidermal necrolysis (TEN),drug-induced hypersensitivity syndrome (DIHS),acute generalized exanthematous pustulosis (AGEP) | Unknown | Bacterial infections |  |  |  |  | 1 / 20 |  | 2 / 80 | <a href="#">31089385</a> |

**Antiepileptic drugs : 1 publication(s)**

|                                                                                                                                                                 |         |          |  |  |  |  |        |  |        |                          |
|-----------------------------------------------------------------------------------------------------------------------------------------------------------------|---------|----------|--|--|--|--|--------|--|--------|--------------------------|
| Stevens-Johnson syndrome (SJS),toxic epidermal necrolysis (TEN),drug-induced hypersensitivity syndrome (DIHS),acute generalized exanthematous pustulosis (AGEP) | Unknown | Epilepsy |  |  |  |  | 4 / 34 |  | 2 / 80 | <a href="#">31089385</a> |
|-----------------------------------------------------------------------------------------------------------------------------------------------------------------|---------|----------|--|--|--|--|--------|--|--------|--------------------------|

**Carbamazepine : 3 publication(s)**

|                                                                                                               |            |          |  |       |  |                 |        |        |             |                          |
|---------------------------------------------------------------------------------------------------------------|------------|----------|--|-------|--|-----------------|--------|--------|-------------|--------------------------|
| Stevens-Johnson syndrome (SJS),toxic epidermal necrolysis (TEN),drug-induced hypersensitivity syndrome (DIHS) | Vietnamese | Epilepsy |  |       |  |                 | 0 / 38 | 1 / 25 |             | <a href="#">25938071</a> |
| Stevens-Johnson syndrome (SJS),toxic epidermal necrolysis (TEN)                                               | European   | Epilepsy |  | 0.348 |  | 1.5 (0.7 - 3.5) | 8 / 28 |        | 1835 / 8862 | <a href="#">30972788</a> |
| Stevens-Johnson syndrome (SJS),toxic epidermal necrolysis (TEN)                                               | European   | Epilepsy |  | 0.113 |  | 2.1 (0.9 - 4.9) | 8 / 28 |        | 85 / 529    | <a href="#">30972788</a> |

**CONTACT**

 National Biobank of Thailand (NBT)

 Tel : 025647000 Ext. 71475

 Email : [nbt@nstda.or.th](mailto:nbt@nstda.or.th)



**EGF receptor inhibitors : 1 publication(s)**

|                               |         |        |        |                       |  |        |          |  |                          |
|-------------------------------|---------|--------|--------|-----------------------|--|--------|----------|--|--------------------------|
| maculopapular exanthema (MPE) | Unknown | Cancer | 0.3929 | 0.638 (0.194 - 2.097) |  | 4 / 38 | 12 / 172 |  | <a href="#">23057547</a> |
|-------------------------------|---------|--------|--------|-----------------------|--|--------|----------|--|--------------------------|

**Lamotrigine : 1 publication(s)**

|                                               |           |          |       |                        |       |                     |       |        |          |                          |
|-----------------------------------------------|-----------|----------|-------|------------------------|-------|---------------------|-------|--------|----------|--------------------------|
| drug-induced hypersensitivity syndrome (DIHS) | Caucasian | Epilepsy | 0.114 | 12.6 (0.27 - 11530000) | 0.716 | 3.22 (0.11 - 47.14) | 1 / 3 | 0 / 10 | 34 / 253 | <a href="#">27888155</a> |
|-----------------------------------------------|-----------|----------|-------|------------------------|-------|---------------------|-------|--------|----------|--------------------------|

**NSAID and 'multi-ingredient cold medication' : 1 publication(s)**

|                                                                                             |         |             |  |  |        |  |        |  |          |                          |
|---------------------------------------------------------------------------------------------|---------|-------------|--|--|--------|--|--------|--|----------|--------------------------|
| Stevens-Johnson syndrome (SJS),toxic epidermal necrolysis (TEN),severe ocular complications | Diverse | Common cold |  |  | 0.0483 |  | 1 / 39 |  | 20 / 133 | <a href="#">28278336</a> |
|---------------------------------------------------------------------------------------------|---------|-------------|--|--|--------|--|--------|--|----------|--------------------------|

**Phenytoin : 1 publication(s)**

|                                                                 |           |          |   |                     |   |                   |       |        |          |                          |
|-----------------------------------------------------------------|-----------|----------|---|---------------------|---|-------------------|-------|--------|----------|--------------------------|
| Stevens-Johnson syndrome (SJS),toxic epidermal necrolysis (TEN) | Caucasian | Epilepsy | 1 | 1.63 (0.05 - 28.75) | 1 | 0.81 (0.04 - 6.7) | 1 / 2 | 2 / 28 | 34 / 253 | <a href="#">27888155</a> |
|-----------------------------------------------------------------|-----------|----------|---|---------------------|---|-------------------|-------|--------|----------|--------------------------|

**HLA-B\*56:01 (No. of detecting tools = 3/3)**

| ADR | Cohort ethnicity | Patient disease | p-value Patients and drug exposed controls | Odds ratio (95% confidence intervals) Patients and drug exposed controls | p-value Patients and population controls | Odds ratio (95% confidence intervals) Patients and population | Patient - carrier/allele frequency | Drug Exposed Controls - carrier/allele frequency | Population Controls - carrier/allele frequency | PMID |
|-----|------------------|-----------------|--------------------------------------------|--------------------------------------------------------------------------|------------------------------------------|---------------------------------------------------------------|------------------------------------|--------------------------------------------------|------------------------------------------------|------|
|-----|------------------|-----------------|--------------------------------------------|--------------------------------------------------------------------------|------------------------------------------|---------------------------------------------------------------|------------------------------------|--------------------------------------------------|------------------------------------------------|------|

**Amoxicillin-clavulanate : 2 publication(s)**

|                                  |           |                      |  |  |   |      |         |  |         |                          |
|----------------------------------|-----------|----------------------|--|--|---|------|---------|--|---------|--------------------------|
| drug induced liver injury (DILI) | Caucasian | Bacterial infections |  |  | 1 | 3.59 | 6 / 134 |  | 1 / 107 | <a href="#">21570397</a> |
| drug induced liver injury (DILI) | Caucasian | Bacterial infections |  |  | 1 | 0.49 | 0 / 48  |  | 2 / 121 | <a href="#">21570397</a> |

**Antibacterial drugs : 2 publication(s)**

|                                                                                                                                                                 |         |                      |  |  |  |  |        |  |        |                          |
|-----------------------------------------------------------------------------------------------------------------------------------------------------------------|---------|----------------------|--|--|--|--|--------|--|--------|--------------------------|
| Stevens-Johnson syndrome (SJS),toxic epidermal necrolysis (TEN),drug-induced hypersensitivity syndrome (DIHS),acute generalized exanthematous pustulosis (AGEP) | Unknown | Bacterial infections |  |  |  |  | 1 / 24 |  | 1 / 80 | <a href="#">31089385</a> |
| Stevens-Johnson syndrome (SJS),toxic epidermal necrolysis (TEN),drug-induced hypersensitivity syndrome (DIHS),acute generalized exanthematous pustulosis (AGEP) | Unknown | Bacterial infections |  |  |  |  | 0 / 20 |  | 1 / 80 | <a href="#">31089385</a> |

**Antiepileptic drugs : 1 publication(s)**

|                                                                                                                                                                 |         |          |  |  |  |  |        |  |        |                          |
|-----------------------------------------------------------------------------------------------------------------------------------------------------------------|---------|----------|--|--|--|--|--------|--|--------|--------------------------|
| Stevens-Johnson syndrome (SJS),toxic epidermal necrolysis (TEN),drug-induced hypersensitivity syndrome (DIHS),acute generalized exanthematous pustulosis (AGEP) | Unknown | Epilepsy |  |  |  |  | 0 / 34 |  | 1 / 80 | <a href="#">31089385</a> |
|-----------------------------------------------------------------------------------------------------------------------------------------------------------------|---------|----------|--|--|--|--|--------|--|--------|--------------------------|

**Carbamazepine : 3 publication(s)**

|                                                                                                                                             |             |          |        |                        |  |  |        |        |  |                          |
|---------------------------------------------------------------------------------------------------------------------------------------------|-------------|----------|--------|------------------------|--|--|--------|--------|--|--------------------------|
| Stevens-Johnson syndrome (SJS),toxic epidermal necrolysis (TEN),drug-induced hypersensitivity syndrome (DIHS),maculopapular exanthema (MPE) | Japanese    | Epilepsy | 0.532  | 2.286 (0.133 - 39.203) |  |  | 1 / 15 | 1 / 33 |  | <a href="#">22211527</a> |
| Stevens-Johnson syndrome (SJS),toxic epidermal necrolysis (TEN)                                                                             | Han Chinese | Epilepsy | 0.48   | 0.28 (0.01 - 7.67)     |  |  | 0 / 13 | 1 / 12 |  | <a href="#">22348435</a> |
| Stevens-Johnson syndrome (SJS),toxic epidermal necrolysis (TEN)                                                                             | Thai        | Epilepsy | 0.3055 | 3.15 (0.31 - 31.62)    |  |  | 3 / 42 | 1 / 42 |  | <a href="#">20345939</a> |

**CONTACT**

 National Biobank of Thailand (NBT)

 Tel : 025647000 Ext. 71475

 Email : [nbt@nstda.or.th](mailto:nbt@nstda.or.th)



**NSAID and 'multi-ingredient cold medication' : 1 publication(s)**

|                                                                                            |         |             |  |       |  |        |         |                          |
|--------------------------------------------------------------------------------------------|---------|-------------|--|-------|--|--------|---------|--------------------------|
| Stevens-Johnson syndrome (SJS),toxic epidermal necrolysis (TEN),severe ocular complicatoin | Diverse | Common cold |  | 0.575 |  | 0 / 39 | 4 / 133 | <a href="#">28278336</a> |
|--------------------------------------------------------------------------------------------|---------|-------------|--|-------|--|--------|---------|--------------------------|

**Oxcarbazepine : 1 publication(s)**

|                               |             |          |      |                      |      |                       |        |        |          |                          |
|-------------------------------|-------------|----------|------|----------------------|------|-----------------------|--------|--------|----------|--------------------------|
| maculopapular exanthema (MPE) | Han Chinese | Epilepsy | 0.33 | 6.16 (0.24 - 156.27) | 0.07 | 22.85 (2.01 - 259.72) | 1 / 14 | 0 / 28 | 2 / 1236 | <a href="#">23829937</a> |
|-------------------------------|-------------|----------|------|----------------------|------|-----------------------|--------|--------|----------|--------------------------|

**Phenytoin : 1 publication(s)**

|                                                                 |             |          |        |                  |  |  |        |         |  |                          |
|-----------------------------------------------------------------|-------------|----------|--------|------------------|--|--|--------|---------|--|--------------------------|
| Stevens-Johnson syndrome (SJS),toxic epidermal necrolysis (TEN) | Han Chinese | Epilepsy | 0.4654 | 2.2 (0.2 - 25.5) |  |  | 1 / 26 | 2 / 113 |  | <a href="#">20235791</a> |
|-----------------------------------------------------------------|-------------|----------|--------|------------------|--|--|--------|---------|--|--------------------------|

**HLA-C\*01:02 (No. of detecting tools = 3/3)**

| ADR | Cohort ethnicity | Patient disease | p-value Patients and drug exposed controls | Odds ratio (95% confidence intervals) Patients and drug exposed controls | p-value Patients and population controls | Odds ratio (95% confidence intervals) Patients and population | Patient - carrier/allele frequency | Drug Exposed Controls - carrier/allele frequency | Population Controls - carrier/allele frequency | PMID |
|-----|------------------|-----------------|--------------------------------------------|--------------------------------------------------------------------------|------------------------------------------|---------------------------------------------------------------|------------------------------------|--------------------------------------------------|------------------------------------------------|------|
|-----|------------------|-----------------|--------------------------------------------|--------------------------------------------------------------------------|------------------------------------------|---------------------------------------------------------------|------------------------------------|--------------------------------------------------|------------------------------------------------|------|

**Carbamazepine : 6 publication(s)**

|                                                                 |             |          |        |                  |  |  |        |          |  |                          |
|-----------------------------------------------------------------|-------------|----------|--------|------------------|--|--|--------|----------|--|--------------------------|
| Stevens-Johnson syndrome (SJS),toxic epidermal necrolysis (TEN) | Han Chinese | Epilepsy | 0.0086 | 0.26 (0.1 - 0.6) |  |  | 8 / 60 | 54 / 144 |  | <a href="#">16538176</a> |
| drug-induced hypersensitivity syndrome (DIHS)                   | Han Chinese | Epilepsy |        | 1.04 (0.3 - 3.2) |  |  | 5 / 13 | 54 / 144 |  | <a href="#">16538176</a> |
| maculopapular exanthema (MPE)                                   | Han Chinese | Epilepsy |        | 1.67 (0.6 - 4.3) |  |  | 9 / 18 | 54 / 144 |  | <a href="#">16538176</a> |
| Stevens-Johnson syndrome (SJS)                                  | Korean      | Epilepsy |        | 2.1 (0.4 - 10.8) |  |  | 3 / 7  | 13 / 50  |  | <a href="#">21917426</a> |
| drug-induced hypersensitivity syndrome (DIHS)                   | Korean      | Epilepsy |        | 0.6 (0.2 - 2.5)  |  |  | 3 / 17 | 13 / 50  |  | <a href="#">21917426</a> |
| drug-induced skin reaction (DISI)                               | Korean      | Epilepsy |        | 1.3 (0.4 - 4.2)  |  |  | 6 / 24 | 13 / 50  |  | <a href="#">21917426</a> |

**Clarithromycin : 1 publication(s)**

|                                   |             |                      |      |                    |      |                    |        |        |          |                          |
|-----------------------------------|-------------|----------------------|------|--------------------|------|--------------------|--------|--------|----------|--------------------------|
| drug-induced skin reaction (DISI) | Han Chinese | Bacterial infections | 0.21 | 5.4 (1.31 - 22.28) | 0.73 | 3.05 (0.94 - 9.88) | 7 / 12 | 7 / 34 | 89 / 283 | <a href="#">29575644</a> |
|-----------------------------------|-------------|----------------------|------|--------------------|------|--------------------|--------|--------|----------|--------------------------|

**Lamotrigine : 1 publication(s)**

|                              |        |          |       |                    |       |                   |         |        |           |                          |
|------------------------------|--------|----------|-------|--------------------|-------|-------------------|---------|--------|-----------|--------------------------|
| maculopapular eruption (MPE) | Korean | Epilepsy | 0.086 | 2.96 (0.92 - 9.53) | 0.033 | 2.68 (1.11 - 6.5) | 12 / 21 | 9 / 29 | 161 / 485 | <a href="#">26282450</a> |
|------------------------------|--------|----------|-------|--------------------|-------|-------------------|---------|--------|-----------|--------------------------|

**NSAID and 'multi-ingredient cold medication' : 1 publication(s)**

|                                                                                            |         |             |  |  |       |  |        |  |         |                          |
|--------------------------------------------------------------------------------------------|---------|-------------|--|--|-------|--|--------|--|---------|--------------------------|
| Stevens-Johnson syndrome (SJS),toxic epidermal necrolysis (TEN),severe ocular complicatoin | Diverse | Common cold |  |  | 0.686 |  | 1 / 39 |  | 8 / 133 | <a href="#">28278336</a> |
|--------------------------------------------------------------------------------------------|---------|-------------|--|--|-------|--|--------|--|---------|--------------------------|

**Phenytoin : 1 publication(s)**

|                                                                 |             |          |        |                 |  |  |        |          |  |                          |
|-----------------------------------------------------------------|-------------|----------|--------|-----------------|--|--|--------|----------|--|--------------------------|
| Stevens-Johnson syndrome (SJS),toxic epidermal necrolysis (TEN) | Han Chinese | Epilepsy | 0.1103 | 0.4 (0.1 - 1.2) |  |  | 5 / 26 | 41 / 113 |  | <a href="#">20235791</a> |
|-----------------------------------------------------------------|-------------|----------|--------|-----------------|--|--|--------|----------|--|--------------------------|

**Tetanus antitoxin : 1 publication(s)**

|                              |             |         |  |  |      |  |        |       |          |                          |
|------------------------------|-------------|---------|--|--|------|--|--------|-------|----------|--------------------------|
| maculopapular eruption (MPE) | Han Chinese | Tetanus |  |  | 0.09 |  | 8 / 15 | / 118 | 88 / 283 | <a href="#">27749688</a> |
|------------------------------|-------------|---------|--|--|------|--|--------|-------|----------|--------------------------|

**CONTACT**

 National Biobank of Thailand (NBT)

 Tel : 025647000 Ext. 71475

 Email : nbt@nstda.or.th

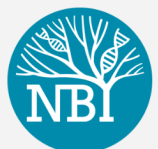

## HLA-C\*07 (No. of detecting tools = 3/3)

| ADR                          | Cohort ethnicity | Patient disease | p-value<br>Patients and<br>drug exposed<br>controls | Odds ratio<br>(95%<br>confidence<br>intervals)<br>Patients and<br>drug<br>exposed<br>controls | p-value<br>Patients and<br>population<br>controls | Odds ratio<br>(95%<br>confidence<br>intervals)<br>Patients<br>and<br>population | Patient -<br>carrier/allele<br>frequency | Drug<br>Exposed<br>Controls -<br>carrier/allele<br>frequency | Population<br>Controls -<br>carrier/allele<br>frequency | PMID                     |
|------------------------------|------------------|-----------------|-----------------------------------------------------|-----------------------------------------------------------------------------------------------|---------------------------------------------------|---------------------------------------------------------------------------------|------------------------------------------|--------------------------------------------------------------|---------------------------------------------------------|--------------------------|
| Clozapine : 1 publication(s) |                  |                 |                                                     |                                                                                               |                                                   |                                                                                 |                                          |                                                              |                                                         |                          |
| agranulocytosis              | Caucasian        | Schizophrenia   | 0.02                                                |                                                                                               |                                                   |                                                                                 | 20 / 31                                  | 30 / 77                                                      |                                                         | <a href="#">11266078</a> |

## HLA-C\*07:01 (No. of detecting tools = 3/3)

| ADR                                                                                         | Cohort ethnicity | Patient disease | p-value<br>Patients and<br>drug exposed<br>controls | Odds ratio<br>(95%<br>confidence<br>intervals)<br>Patients and<br>drug<br>exposed<br>controls | p-value<br>Patients and<br>population<br>controls | Odds ratio<br>(95%<br>confidence<br>intervals)<br>Patients<br>and<br>population | Patient -<br>carrier/allele<br>frequency | Drug<br>Exposed<br>Controls -<br>carrier/allele<br>frequency | Population<br>Controls -<br>carrier/allele<br>frequency | PMID                     |
|---------------------------------------------------------------------------------------------|------------------|-----------------|-----------------------------------------------------|-----------------------------------------------------------------------------------------------|---------------------------------------------------|---------------------------------------------------------------------------------|------------------------------------------|--------------------------------------------------------------|---------------------------------------------------------|--------------------------|
| EGF receptor inhibitors : 1 publication(s)                                                  |                  |                 |                                                     |                                                                                               |                                                   |                                                                                 |                                          |                                                              |                                                         |                          |
| maculopapular exanthema (MPE)                                                               | Unknown          | Cancer          | 0.1241                                              | 0.424 (0.176 - 1.023)                                                                         |                                                   |                                                                                 | 9 / 38                                   | 20 / 173                                                     |                                                         | <a href="#">23057547</a> |
| Lamotrigine : 3 publication(s)                                                              |                  |                 |                                                     |                                                                                               |                                                   |                                                                                 |                                          |                                                              |                                                         |                          |
| Stevens–Johnson syndrome (SJS),toxic epidermal necrolysis (TEN)                             | Caucasian        | Epilepsy        | 0.846                                               | 4.5 (0.08 - 327.95)                                                                           | 1                                                 | 1.26 (0.04 - 18.02)                                                             | 1 / 3                                    | 1 / 10                                                       | 72 / 253                                                | <a href="#">27888155</a> |
| drug-induced hypersensitivity syndrome (DIHS)                                               | Caucasian        | Epilepsy        | 0.217                                               | 18 (0.47 - 3603.25)                                                                           | 0.403                                             | 5.03 (0.35 - 142.38)                                                            | 2 / 3                                    | 1 / 10                                                       | 72 / 253                                                | <a href="#">27888155</a> |
| maculopapular eruption (MPE)                                                                | Korean           | Epilepsy        | 0.254                                               |                                                                                               | 1                                                 |                                                                                 | 0 / 21                                   | 3 / 29                                                       | 3 / 485                                                 | <a href="#">26282450</a> |
| NSAID and 'multi-ingredient cold medication' : 1 publication(s)                             |                  |                 |                                                     |                                                                                               |                                                   |                                                                                 |                                          |                                                              |                                                         |                          |
| Stevens–Johnson syndrome (SJS),toxic epidermal necrolysis (TEN),severe ocular complicatoins | Diverse          | Common cold     |                                                     |                                                                                               | 0.555                                             |                                                                                 | 10 / 39                                  |                                                              | 43 / 133                                                | <a href="#">28278336</a> |

## Phenytoin : 2 publication(s)

|                                                                 |           |          |       |                    |   |                    |       |        |          |                          |
|-----------------------------------------------------------------|-----------|----------|-------|--------------------|---|--------------------|-------|--------|----------|--------------------------|
| Stevens–Johnson syndrome (SJS),toxic epidermal necrolysis (TEN) | Caucasian | Epilepsy | 0.754 | 1.83 (0.26 - 12.6) | 1 | 1.26 (0.24 - 5.86) | 3 / 2 | 6 / 28 | 72 / 253 | <a href="#">27888155</a> |
| drug-induced hypersensitivity syndrome (DIHS)                   | Caucasian | Epilepsy | 1     | 0.57 (0.02 - 7.71) | 1 | 0.63 (0.03 - 6.11) | 1 / 5 | 7 / 28 | 72 / 253 | <a href="#">27888155</a> |

## HLA-DPB1\*04:01 (No. of detecting tools = 3/3)

| ADR                             | Cohort ethnicity | Patient disease      | p-value<br>Patients and<br>drug exposed<br>controls | Odds ratio<br>(95%<br>confidence<br>intervals)<br>Patients and<br>drug<br>exposed<br>controls | p-value<br>Patients and<br>population<br>controls | Odds ratio<br>(95%<br>confidence<br>intervals)<br>Patients<br>and<br>population | Patient -<br>carrier/allele<br>frequency | Drug<br>Exposed<br>Controls -<br>carrier/allele<br>frequency | Population<br>Controls -<br>carrier/allele<br>frequency | PMID                     |
|---------------------------------|------------------|----------------------|-----------------------------------------------------|-----------------------------------------------------------------------------------------------|---------------------------------------------------|---------------------------------------------------------------------------------|------------------------------------------|--------------------------------------------------------------|---------------------------------------------------------|--------------------------|
| Bucillamine : 1 publication(s)  |                  |                      |                                                     |                                                                                               |                                                   |                                                                                 |                                          |                                                              |                                                         |                          |
| bucillamine-induced proteinuria | Japanese         | Rheumatoid arthritis |                                                     | 1.02                                                                                          |                                                   |                                                                                 | 2 / 25                                   | 36 / 460                                                     |                                                         | <a href="#">24899791</a> |

## CONTACT

 National Biobank of Thailand (NBT)

 Tel : 025647000 Ext. 71475

 Email : [nbt@nstda.or.th](mailto:nbt@nstda.or.th)

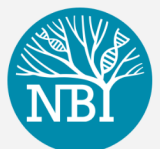

## HLA-DPB1\*14:01 (No. of detecting tools = 3/3)

| ADR                             | Cohort ethnicity | Patient disease      | p-value<br>Patients and<br>drug exposed<br>controls | Odds ratio<br>(95%<br>confidence<br>intervals)<br>Patients and<br>drug<br>exposed<br>controls | p-value<br>Patients and<br>population<br>controls | Odds ratio<br>(95%<br>confidence<br>intervals)<br>Patients<br>and<br>population | Patient -<br>carrier/allele<br>frequency | Drug<br>Exposed<br>Controls -<br>carrier/allele<br>frequency | Population<br>Controls -<br>carrier/allele<br>frequency | PMID                     |
|---------------------------------|------------------|----------------------|-----------------------------------------------------|-----------------------------------------------------------------------------------------------|---------------------------------------------------|---------------------------------------------------------------------------------|------------------------------------------|--------------------------------------------------------------|---------------------------------------------------------|--------------------------|
| Bucillamine : 1 publication(s)  |                  |                      |                                                     |                                                                                               |                                                   |                                                                                 |                                          |                                                              |                                                         |                          |
| bucillamine-induced proteinuria | Japanese         | Rheumatoid arthritis |                                                     | 0.5                                                                                           |                                                   |                                                                                 | 0 / 25                                   | 17 / 460                                                     |                                                         | <a href="#">24899791</a> |

## HLA-DQA1\*01:01 (No. of detecting tools = 3/3)

| ADR                                        | Cohort ethnicity | Patient disease      | p-value<br>Patients and<br>drug exposed<br>controls | Odds ratio<br>(95%<br>confidence<br>intervals)<br>Patients and<br>drug<br>exposed<br>controls | p-value<br>Patients and<br>population<br>controls | Odds ratio<br>(95%<br>confidence<br>intervals)<br>Patients<br>and<br>population | Patient -<br>carrier/allele<br>frequency | Drug<br>Exposed<br>Controls -<br>carrier/allele<br>frequency | Population<br>Controls -<br>carrier/allele<br>frequency | PMID                     |
|--------------------------------------------|------------------|----------------------|-----------------------------------------------------|-----------------------------------------------------------------------------------------------|---------------------------------------------------|---------------------------------------------------------------------------------|------------------------------------------|--------------------------------------------------------------|---------------------------------------------------------|--------------------------|
| Amoxicillin-clavulanate : 2 publication(s) |                  |                      |                                                     |                                                                                               |                                                   |                                                                                 |                                          |                                                              |                                                         |                          |
| drug induced liver injury (DILI)           | Caucasian        | Bacterial infections |                                                     |                                                                                               | 1                                                 | 0.62                                                                            | 27 / 134                                 |                                                              | 35 / 107                                                | <a href="#">21570397</a> |
| drug induced liver injury (DILI)           | Caucasian        | Bacterial infections |                                                     |                                                                                               | 1                                                 | 0.79                                                                            | 14 / 48                                  |                                                              | 45 / 121                                                | <a href="#">21570397</a> |

## HLA-DQA1\*05:01 (No. of detecting tools = 3/3)

| ADR                                        | Cohort ethnicity | Patient disease      | p-value<br>Patients and<br>drug exposed<br>controls | Odds ratio<br>(95%<br>confidence<br>intervals)<br>Patients and<br>drug<br>exposed<br>controls | p-value<br>Patients and<br>population<br>controls | Odds ratio<br>(95%<br>confidence<br>intervals)<br>Patients<br>and<br>population | Patient -<br>carrier/allele<br>frequency | Drug<br>Exposed<br>Controls -<br>carrier/allele<br>frequency | Population<br>Controls -<br>carrier/allele<br>frequency | PMID                     |
|--------------------------------------------|------------------|----------------------|-----------------------------------------------------|-----------------------------------------------------------------------------------------------|---------------------------------------------------|---------------------------------------------------------------------------------|------------------------------------------|--------------------------------------------------------------|---------------------------------------------------------|--------------------------|
| Amoxicillin-clavulanate : 2 publication(s) |                  |                      |                                                     |                                                                                               |                                                   |                                                                                 |                                          |                                                              |                                                         |                          |
| drug induced liver injury (DILI)           | Caucasian        | Bacterial infections |                                                     |                                                                                               | 1                                                 | 0.73                                                                            | 51 / 134                                 |                                                              | 53 / 107                                                | <a href="#">21570397</a> |
| drug induced liver injury (DILI)           | Caucasian        | Bacterial infections |                                                     |                                                                                               | 1                                                 | 0.98                                                                            | 25 / 48                                  |                                                              | 63 / 121                                                | <a href="#">21570397</a> |

## HLA-DQB1\*02:01 (No. of detecting tools = 3/3)

| ADR                                        | Cohort ethnicity | Patient disease      | p-value<br>Patients and<br>drug exposed<br>controls | Odds ratio<br>(95%<br>confidence<br>intervals)<br>Patients and<br>drug<br>exposed<br>controls | p-value<br>Patients and<br>population<br>controls | Odds ratio<br>(95%<br>confidence<br>intervals)<br>Patients<br>and<br>population | Patient -<br>carrier/allele<br>frequency | Drug<br>Exposed<br>Controls -<br>carrier/allele<br>frequency | Population<br>Controls -<br>carrier/allele<br>frequency | PMID                     |
|--------------------------------------------|------------------|----------------------|-----------------------------------------------------|-----------------------------------------------------------------------------------------------|---------------------------------------------------|---------------------------------------------------------------------------------|------------------------------------------|--------------------------------------------------------------|---------------------------------------------------------|--------------------------|
| Amoxicillin-clavulanate : 2 publication(s) |                  |                      |                                                     |                                                                                               |                                                   |                                                                                 |                                          |                                                              |                                                         |                          |
| drug induced liver injury (DILI)           | Caucasian        | Bacterial infections |                                                     |                                                                                               | 0.4724                                            | 0.55                                                                            | 42 / 134                                 |                                                              | 49 / 107                                                | <a href="#">21570397</a> |
| drug induced liver injury (DILI)           | Caucasian        | Bacterial infections |                                                     |                                                                                               | 1                                                 | 0.64                                                                            | 19 / 48                                  |                                                              | 61 / 121                                                | <a href="#">21570397</a> |

## CONTACT

 National Biobank of Thailand (NBT)

 Tel : 025647000 Ext. 71475

 Email : [nbt@nstda.or.th](mailto:nbt@nstda.or.th)

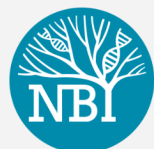

## Clozapine : 1 publication(s)

|                 |           |               |      |                    |  |  |         |         |  |                          |
|-----------------|-----------|---------------|------|--------------------|--|--|---------|---------|--|--------------------------|
| agranulocytosis | Caucasian | Schizophrenia | 0.07 | 2.22 (0.92 - 5.36) |  |  | 13 / 30 | 20 / 77 |  | <a href="#">11146763</a> |
|-----------------|-----------|---------------|------|--------------------|--|--|---------|---------|--|--------------------------|

## HLA-DQB1\*05:01 (No. of detecting tools = 3/3)

| ADR | Cohort ethnicity | Patient disease | p-value Patients and drug exposed controls | Odds ratio (95% confidence intervals) Patients and drug exposed controls | p-value Patients and population controls | Odds ratio (95% confidence intervals) Patients and population | Patient - carrier/allele frequency | Drug Exposed Controls - carrier/allele frequency | Population Controls - carrier/allele frequency | PMID |
|-----|------------------|-----------------|--------------------------------------------|--------------------------------------------------------------------------|------------------------------------------|---------------------------------------------------------------|------------------------------------|--------------------------------------------------|------------------------------------------------|------|
|-----|------------------|-----------------|--------------------------------------------|--------------------------------------------------------------------------|------------------------------------------|---------------------------------------------------------------|------------------------------------|--------------------------------------------------|------------------------------------------------|------|

## Amoxicillin-clavulanate : 2 publication(s)

|                                  |           |                      |  |  |   |      |          |  |          |                          |
|----------------------------------|-----------|----------------------|--|--|---|------|----------|--|----------|--------------------------|
| drug induced liver injury (DILI) | Caucasian | Bacterial infections |  |  | 1 | 0.65 | 23 / 134 |  | 30 / 107 | <a href="#">21570397</a> |
| drug induced liver injury (DILI) | Caucasian | Bacterial infections |  |  | 1 | 0.69 | 10 / 48  |  | 36 / 121 | <a href="#">21570397</a> |

## Bucillamine : 1 publication(s)

|                                 |          |                      |  |      |  |  |        |          |  |                          |
|---------------------------------|----------|----------------------|--|------|--|--|--------|----------|--|--------------------------|
| bucillamine-induced proteinuria | Japanese | Rheumatoid arthritis |  | 0.77 |  |  | 3 / 25 | 69 / 460 |  | <a href="#">24899791</a> |
|---------------------------------|----------|----------------------|--|------|--|--|--------|----------|--|--------------------------|

## Oxcarbazepine : 1 publication(s)

|                               |        |          |       |                    |       |                    |        |        |          |                          |
|-------------------------------|--------|----------|-------|--------------------|-------|--------------------|--------|--------|----------|--------------------------|
| maculopapular exanthema (MPE) | Korean | Epilepsy | 0.254 | 0.23 (0.03 - 1.95) | 0.012 | 0.13 (0.02 - 0.93) | 1 / 40 | 7 / 70 | 82 / 485 | <a href="#">27666425</a> |
|-------------------------------|--------|----------|-------|--------------------|-------|--------------------|--------|--------|----------|--------------------------|

## HLA-DRB1\*01 (No. of detecting tools = 3/3)

| ADR | Cohort ethnicity | Patient disease | p-value Patients and drug exposed controls | Odds ratio (95% confidence intervals) Patients and drug exposed controls | p-value Patients and population controls | Odds ratio (95% confidence intervals) Patients and population | Patient - carrier/allele frequency | Drug Exposed Controls - carrier/allele frequency | Population Controls - carrier/allele frequency | PMID |
|-----|------------------|-----------------|--------------------------------------------|--------------------------------------------------------------------------|------------------------------------------|---------------------------------------------------------------|------------------------------------|--------------------------------------------------|------------------------------------------------|------|
|-----|------------------|-----------------|--------------------------------------------|--------------------------------------------------------------------------|------------------------------------------|---------------------------------------------------------------|------------------------------------|--------------------------------------------------|------------------------------------------------|------|

## Flucloxacillin : 1 publication(s)

|                                  |           |                      |       |  |  |  |        |         |  |                          |
|----------------------------------|-----------|----------------------|-------|--|--|--|--------|---------|--|--------------------------|
| drug induced liver injury (DILI) | Caucasian | Bacterial infections | 0.459 |  |  |  | 7 / 51 | 13 / 64 |  | <a href="#">19483685</a> |
|----------------------------------|-----------|----------------------|-------|--|--|--|--------|---------|--|--------------------------|

## HLA-DRB1\*01:01 (No. of detecting tools = 3/3)

| ADR | Cohort ethnicity | Patient disease | p-value Patients and drug exposed controls | Odds ratio (95% confidence intervals) Patients and drug exposed controls | p-value Patients and population controls | Odds ratio (95% confidence intervals) Patients and population | Patient - carrier/allele frequency | Drug Exposed Controls - carrier/allele frequency | Population Controls - carrier/allele frequency | PMID |
|-----|------------------|-----------------|--------------------------------------------|--------------------------------------------------------------------------|------------------------------------------|---------------------------------------------------------------|------------------------------------|--------------------------------------------------|------------------------------------------------|------|
|-----|------------------|-----------------|--------------------------------------------|--------------------------------------------------------------------------|------------------------------------------|---------------------------------------------------------------|------------------------------------|--------------------------------------------------|------------------------------------------------|------|

## Amoxicillin-clavulanate : 2 publication(s)

|                                  |           |                      |  |  |   |      |          |  |          |                          |
|----------------------------------|-----------|----------------------|--|--|---|------|----------|--|----------|--------------------------|
| drug induced liver injury (DILI) | Caucasian | Bacterial infections |  |  | 1 | 0.68 | 18 / 134 |  | 23 / 107 | <a href="#">21570397</a> |
| drug induced liver injury (DILI) | Caucasian | Bacterial infections |  |  | 1 | 0.75 | 4 / 48   |  | 14 / 121 | <a href="#">21570397</a> |

## Antiepileptic drugs : 1 publication(s)

|                                                                 |             |          |       |                        |  |  |        |        |  |                          |
|-----------------------------------------------------------------|-------------|----------|-------|------------------------|--|--|--------|--------|--|--------------------------|
| Stevens-Johnson syndrome (SJS),toxic epidermal necrolysis (TEN) | Han Chinese | Epilepsy | 0.167 | 10.2 (0.842 - 123.558) |  |  | 1 / 10 | 0 / 50 |  | <a href="#">24856347</a> |
|-----------------------------------------------------------------|-------------|----------|-------|------------------------|--|--|--------|--------|--|--------------------------|

## CONTACT

 National Biobank of Thailand (NBT)

 Tel : 025647000 Ext. 71475

 Email : nbt@nstda.or.th



**Bucillamine : 1 publication(s)**

|                                 |          |                      |      |  |        |          |                          |
|---------------------------------|----------|----------------------|------|--|--------|----------|--------------------------|
| bucillamine-induced proteinuria | Japanese | Rheumatoid arthritis | 0.83 |  | 3 / 25 | 65 / 460 | <a href="#">24899791</a> |
|---------------------------------|----------|----------------------|------|--|--------|----------|--------------------------|

**Carbamazepine : 2 publication(s)**

|                                                                 |             |          |       |                   |        |         |        |                          |
|-----------------------------------------------------------------|-------------|----------|-------|-------------------|--------|---------|--------|--------------------------|
| maculopapular exanthema (MPE)                                   | Han Chinese | Epilepsy | 0.169 | 0.056             | 4 / 40 | 1 / 52  | 1 / 72 | <a href="#">23830818</a> |
| Stevens-Johnson syndrome (SJS),toxic epidermal necrolysis (TEN) | Han Chinese | Epilepsy | 0.013 | 14 (1.53 - 128.1) | 4 / 54 | 1 / 176 |        | <a href="#">28476759</a> |

**Clozapine : 1 publication(s)**

|                 |           |               |      |  |        |         |                          |
|-----------------|-----------|---------------|------|--|--------|---------|--------------------------|
| agranulocytosis | Caucasian | Schizophrenia | 0.06 |  | 3 / 31 | 20 / 77 | <a href="#">11266078</a> |
|-----------------|-----------|---------------|------|--|--------|---------|--------------------------|

**Co-trimoxazole : 1 publication(s)**

|                                                              |           |     |  |  |         |         |                          |
|--------------------------------------------------------------|-----------|-----|--|--|---------|---------|--------------------------|
| maculopapular exanthema (MPE),Stevens-Johnson syndrome (SJS) | Caucasian | HIV |  |  | 11 / 53 | 12 / 83 | <a href="#">19374512</a> |
|--------------------------------------------------------------|-----------|-----|--|--|---------|---------|--------------------------|

**EGF receptor inhibitors : 1 publication(s)**

|                               |         |        |        |                     |        |          |                          |
|-------------------------------|---------|--------|--------|---------------------|--------|----------|--------------------------|
| maculopapular exanthema (MPE) | Unknown | Cancer | 0.5782 | 0.812 (0.254 - 2.6) | 4 / 38 | 15 / 173 | <a href="#">23057547</a> |
|-------------------------------|---------|--------|--------|---------------------|--------|----------|--------------------------|

**Nevirapine : 2 publication(s)**

|                                                                    |           |     |      |        |         |                          |                          |
|--------------------------------------------------------------------|-----------|-----|------|--------|---------|--------------------------|--------------------------|
| drug-induced hypersensitivity syndrome (DIHS)                      | Diverse   | HIV | 0.14 | 0 / 54 | 3 / 103 | <a href="#">23328091</a> |                          |
| drug-induced skin reaction (DISI),drug induced liver injury (DILI) | Caucasian | HIV |      | 0 / 26 | 3 / 72  | 7 / 164                  | <a href="#">16868443</a> |

**HLA-DRB1\*03 (No. of detecting tools = 3/3)**

| ADR | Cohort ethnicity | Patient disease | p-value<br>Patients and<br>drug exposed<br>controls | Odds ratio<br>(95%<br>confidence<br>intervals)<br>Patients and<br>drug<br>exposed<br>controls | p-value<br>Patients and<br>population<br>controls | Odds ratio<br>(95%<br>confidence<br>intervals)<br>Patients<br>and<br>population | Patient -<br>carrier/allele<br>frequency | Drug<br>Exposed<br>Controls -<br>carrier/allele<br>frequency | Population<br>Controls -<br>carrier/allele<br>frequency | PMID |
|-----|------------------|-----------------|-----------------------------------------------------|-----------------------------------------------------------------------------------------------|---------------------------------------------------|---------------------------------------------------------------------------------|------------------------------------------|--------------------------------------------------------------|---------------------------------------------------------|------|
|-----|------------------|-----------------|-----------------------------------------------------|-----------------------------------------------------------------------------------------------|---------------------------------------------------|---------------------------------------------------------------------------------|------------------------------------------|--------------------------------------------------------------|---------------------------------------------------------|------|

**Flucloxacillin : 1 publication(s)**

|                                  |           |                      |       |  |  |  |         |         |                          |
|----------------------------------|-----------|----------------------|-------|--|--|--|---------|---------|--------------------------|
| drug induced liver injury (DILI) | Caucasian | Bacterial infections | 0.557 |  |  |  | 16 / 51 | 24 / 64 | <a href="#">19483685</a> |
|----------------------------------|-----------|----------------------|-------|--|--|--|---------|---------|--------------------------|

**HLA-DRB1\*03:01 (No. of detecting tools = 3/3)**

| ADR | Cohort ethnicity | Patient disease | p-value<br>Patients and<br>drug exposed<br>controls | Odds ratio<br>(95%<br>confidence<br>intervals)<br>Patients and<br>drug<br>exposed<br>controls | p-value<br>Patients and<br>population<br>controls | Odds ratio<br>(95%<br>confidence<br>intervals)<br>Patients<br>and<br>population | Patient -<br>carrier/allele<br>frequency | Drug<br>Exposed<br>Controls -<br>carrier/allele<br>frequency | Population<br>Controls -<br>carrier/allele<br>frequency | PMID |
|-----|------------------|-----------------|-----------------------------------------------------|-----------------------------------------------------------------------------------------------|---------------------------------------------------|---------------------------------------------------------------------------------|------------------------------------------|--------------------------------------------------------------|---------------------------------------------------------|------|
|-----|------------------|-----------------|-----------------------------------------------------|-----------------------------------------------------------------------------------------------|---------------------------------------------------|---------------------------------------------------------------------------------|------------------------------------------|--------------------------------------------------------------|---------------------------------------------------------|------|

**Allopurinol : 1 publication(s)**

|                                                                                                               |             |      |           |      |         |      |         |          |         |                          |
|---------------------------------------------------------------------------------------------------------------|-------------|------|-----------|------|---------|------|---------|----------|---------|--------------------------|
| Stevens-Johnson syndrome (SJS),toxic epidermal necrolysis (TEN),drug-induced hypersensitivity syndrome (DIHS) | Han Chinese | Gout | 0.0000028 | 12.7 | 0.00085 | 10.3 | 33 / 51 | 17 / 135 | 14 / 93 | <a href="#">15743917</a> |
|---------------------------------------------------------------------------------------------------------------|-------------|------|-----------|------|---------|------|---------|----------|---------|--------------------------|

**Amoxicillin-clavulanate : 2 publication(s)**

|                                  |           |                      |  |  |   |      |          |  |          |                          |
|----------------------------------|-----------|----------------------|--|--|---|------|----------|--|----------|--------------------------|
| drug induced liver injury (DILI) | Caucasian | Bacterial infections |  |  | 1 | 0.71 | 30 / 134 |  | 31 / 107 | <a href="#">21570397</a> |
|----------------------------------|-----------|----------------------|--|--|---|------|----------|--|----------|--------------------------|

**CONTACT**

 National Biobank of Thailand (NBT)

 Tel : 025647000 Ext. 71475

 Email : nbt@nstda.or.th



**Amoxicillin-clavulanate : 2 publication(s)**

|                                  |           |                      |   |      |         |          |                          |
|----------------------------------|-----------|----------------------|---|------|---------|----------|--------------------------|
| drug induced liver injury (DILI) | Caucasian | Bacterial infections | 1 | 0.83 | 10 / 48 | 29 / 121 | <a href="#">21570397</a> |
|----------------------------------|-----------|----------------------|---|------|---------|----------|--------------------------|

**Carbamazepine : 1 publication(s)**

|                               |             |          |       |      |        |         |        |                          |
|-------------------------------|-------------|----------|-------|------|--------|---------|--------|--------------------------|
| maculopapular exanthema (MPE) | Han Chinese | Epilepsy | 0.024 | 0.75 | 3 / 40 | 14 / 52 | 8 / 72 | <a href="#">23830818</a> |
|-------------------------------|-------------|----------|-------|------|--------|---------|--------|--------------------------|

**Clozapine : 1 publication(s)**

|                 |           |               |  |  |         |         |                          |
|-----------------|-----------|---------------|--|--|---------|---------|--------------------------|
| agranulocytosis | Caucasian | Schizophrenia |  |  | 10 / 31 | 14 / 77 | <a href="#">11266078</a> |
|-----------------|-----------|---------------|--|--|---------|---------|--------------------------|

**Co-trimoxazole : 1 publication(s)**

|                                                               |           |     |  |  |         |         |                          |
|---------------------------------------------------------------|-----------|-----|--|--|---------|---------|--------------------------|
| maculopapular exanthema (MPE), Stevens-Johnson syndrome (SJS) | Caucasian | HIV |  |  | 13 / 53 | 17 / 83 | <a href="#">19374512</a> |
|---------------------------------------------------------------|-----------|-----|--|--|---------|---------|--------------------------|

**Nevirapine : 1 publication(s)**

|                                               |         |     |       |  |        |          |                          |
|-----------------------------------------------|---------|-----|-------|--|--------|----------|--------------------------|
| drug-induced hypersensitivity syndrome (DIHS) | Diverse | HIV | 0.086 |  | 4 / 54 | 15 / 103 | <a href="#">23328091</a> |
|-----------------------------------------------|---------|-----|-------|--|--------|----------|--------------------------|

**Phenytoin : 1 publication(s)**

|                                                                  |             |          |        |               |        |          |                          |
|------------------------------------------------------------------|-------------|----------|--------|---------------|--------|----------|--------------------------|
| Stevens-Johnson syndrome (SJS), toxic epidermal necrolysis (TEN) | Han Chinese | Epilepsy | 0.4618 | 0.3 (0 - 2.7) | 1 / 26 | 12 / 113 | <a href="#">20235791</a> |
|------------------------------------------------------------------|-------------|----------|--------|---------------|--------|----------|--------------------------|

**HLA-DRB3\*01:01 (No. of detecting tools = 3/3)**

| ADR | Cohort ethnicity | Patient disease | p-value<br>Patients and<br>drug exposed<br>controls | Odds ratio<br>(95%<br>confidence<br>intervals)<br>Patients and<br>drug<br>exposed<br>controls | p-value<br>Patients and<br>population<br>controls | Odds ratio<br>(95%<br>confidence<br>intervals)<br>Patients<br>and<br>population | Patient -<br>carrier/allele<br>frequency | Drug<br>Exposed<br>Controls -<br>carrier/allele<br>frequency | Population<br>Controls -<br>carrier/allele<br>frequency | PMID |
|-----|------------------|-----------------|-----------------------------------------------------|-----------------------------------------------------------------------------------------------|---------------------------------------------------|---------------------------------------------------------------------------------|------------------------------------------|--------------------------------------------------------------|---------------------------------------------------------|------|
|-----|------------------|-----------------|-----------------------------------------------------|-----------------------------------------------------------------------------------------------|---------------------------------------------------|---------------------------------------------------------------------------------|------------------------------------------|--------------------------------------------------------------|---------------------------------------------------------|------|

**Clozapine : 1 publication(s)**

|                 |           |               |  |  |         |         |                          |
|-----------------|-----------|---------------|--|--|---------|---------|--------------------------|
| agranulocytosis | Caucasian | Schizophrenia |  |  | 10 / 31 | 19 / 77 | <a href="#">11266078</a> |
|-----------------|-----------|---------------|--|--|---------|---------|--------------------------|

**CONTACT**

 National Biobank of Thailand (NBT)

 Tel : 025647000 Ext. 71475

 Email : [nbt@nstda.or.th](mailto:nbt@nstda.or.th)

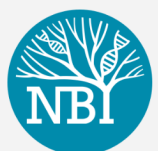

**DISCLAIMER:**

PharmVIP platform is currently provided for research and informational purposes only and is not intended to diagnose, treat, cure, or prevent any disease. The report generated by the platform is not meant to be a substitute for professional medical advice, diagnosis, or treatment provided by a physician or other qualified health care professional. Only a physician, pharmacist or other healthcare professional should advise a patient on the use of the medications prescribed. Any application of the content provided or obtained through the use of the platform is therefore solely at the user's own risk and responsibility.

**CONTACT**

 National Biobank of Thailand (NBT)

 Tel : 025647000 Ext. 71475

 Email : [nbt@nstda.or.th](mailto:nbt@nstda.or.th)

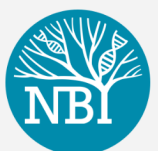

Supplement: s1 [file s1]
