# Supplementary material for: PharmVIP: A Web-Based Tool for Pharmacogenomic Variant Analysis and Interpretation
Source: MDPI journal article supplement (doi:10.3390/jpm11111230), 2021-11-19

## PharmVIP analysis

## Project details

**Project title:** test

**Analysis date:** 17 August 2021 4:08 p.m.

**Analyzed by:** Hello World

## Options &amp; parameters

**Guideline:** 17 genes ( CACNA1S, CFTR, CYP2B6, CYP2C19, CYP2C9, CYP2D6, CYP3A5, CYP4F2, DPYD, G6PD, IFNL3, NUDT15, RYR1, SLCO1B1, TPMT, UGT1A1, VKORC1 )

**HLA:** All HLA genes, Cohort ethnicity ( Caucasian, Diverse, European, Han Chinese, Indian, Japanese, Korean, Thai, Unknown, Vietnamese ), p-value < 0.05

**PGx genes:** 19 genes, ( CPIC guideline 2019, ) Transcript database ( RefSeq transcripts )

**Input files:**

|                   |      |                             |
|-------------------|------|-----------------------------|
| <b>Guideline:</b> | VCF: | 1/1/input/vcf_sample.vcf.gz |
|                   | BAM: | 1/1/input/bam_sample.bam    |
| <b>HLA:</b>       | BAM: | 1/1/input/bam_sample.bam    |
| <b>PGx genes:</b> | VCF: | 1/1/input/vcf_sample.vcf.gz |

## CONTACT

 National Biobank of Thailand (NBT)

 Tel : 025647000 Ext. 71475

 Email : nbt@nstda.or.th

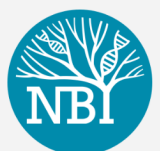

## Summary: Guideline

## Related CPIC guideline(s)

**CACNA1S, RYR1**

| Drug name                                                                                                                                                                                                                          | Diplotype                                   | Phenotype | Recommendations                                                                                                                                                             | Guideline strength |
|------------------------------------------------------------------------------------------------------------------------------------------------------------------------------------------------------------------------------------|---------------------------------------------|-----------|-----------------------------------------------------------------------------------------------------------------------------------------------------------------------------|--------------------|
| <a href="#">desflurane</a> ,<br><a href="#">enflurane</a> ,<br><a href="#">halothane</a> ,<br><a href="#">isoflurane</a> ,<br><a href="#">methoxyflurane</a> ,<br><a href="#">sevoflurane</a> ,<br><a href="#">succinylcholine</a> | Reference/Reference,<br>Reference/Reference | N/A, N/A  | Clinical findings, family history, further genetic testing and other laboratory data should guide use of halogenated volatile anesthetics or depolarizing muscle relaxants. | Strong             |

**CFTR**

| Drug name                 | Diplotype              | Phenotype | Recommendations                                                              | Guideline strength |
|---------------------------|------------------------|-----------|------------------------------------------------------------------------------|--------------------|
| <a href="#">ivacaftor</a> | No CPIC variants found | N/A       | This guideline does not contain recommendations for this allele combination. | N/A                |

**CYP2B6**

| Drug name                 | Diplotype | Phenotype          | Recommendations                                       | Guideline strength |
|---------------------------|-----------|--------------------|-------------------------------------------------------|--------------------|
| <a href="#">efavirenz</a> | *1/*1     | Normal Metabolizer | Initiate efavirenz with standard dosing (600 mg/day). | Strong             |

**CYP2C19**

| Drug name                                                    | Diplotype | Phenotype                | Recommendations                                                                             | Guideline strength |
|--------------------------------------------------------------|-----------|--------------------------|---------------------------------------------------------------------------------------------|--------------------|
| <a href="#">citalopram</a> ,<br><a href="#">escitalopram</a> | *1/*2     | Intermediate Metabolizer | Initiate therapy with recommended starting dose.                                            | Strong             |
| <a href="#">clopidogrel</a>                                  | *1/*2     | Intermediate Metabolizer | Alternative antiplatelet therapy (if no contraindication); e.g., prasugrel, ticagrelor      | Moderate           |
| <a href="#">sertraline</a>                                   | *1/*2     | Intermediate Metabolizer | Initiate therapy with recommended starting dose.                                            | Strong             |
| <a href="#">voriconazole</a>                                 | *1/*2     | Intermediate Metabolizer | For pediatric or adult patients: initiate therapy with recommended standard of care dosing. | Moderate           |

## CONTACT

 National Biobank of Thailand (NBT)

 Tel : 025647000 Ext. 71475

 Email : nbt@nstda.or.th

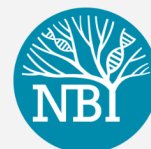

**CYP2C19, CYP2D6**

| Drug name                     | Diplotype       | Phenotype                                     | Recommendations                                                                                                       | Guideline strength |
|-------------------------------|-----------------|-----------------------------------------------|-----------------------------------------------------------------------------------------------------------------------|--------------------|
| <a href="#">amitriptyline</a> | *1/*2,<br>*3/*4 | Intermediate Metabolizer,<br>Poor Metabolizer | Avoid amitriptyline use. If<br>amitriptyline is warranted, consider<br>50% reduction of recommended<br>starting dose. | Optional           |
| <a href="#">clomipramine</a>  | *1/*2,<br>*3/*4 | Intermediate Metabolizer,<br>Poor Metabolizer | Avoid amitriptyline use. If<br>amitriptyline is warranted, consider<br>50% reduction of recommended<br>starting dose. | Optional           |
| <a href="#">doxepin</a>       | *1/*2,<br>*3/*4 | Intermediate Metabolizer,<br>Poor Metabolizer | Avoid amitriptyline use. If<br>amitriptyline is warranted, consider<br>50% reduction of recommended<br>starting dose. | Optional           |
| <a href="#">imipramine</a>    | *1/*2,<br>*3/*4 | Intermediate Metabolizer,<br>Poor Metabolizer | Avoid amitriptyline use. If<br>amitriptyline is warranted, consider<br>50% reduction of recommended<br>starting dose. | Optional           |
| <a href="#">trimipramine</a>  | *1/*2,<br>*3/*4 | Intermediate Metabolizer,<br>Poor Metabolizer | Avoid amitriptyline use. If<br>amitriptyline is warranted, consider<br>50% reduction of recommended<br>starting dose. | Optional           |

**CYP2C9, CYP4F2, VKORC1**

| Drug name                | Diplotype                   | Phenotype     | Recommendations | Guideline strength |
|--------------------------|-----------------------------|---------------|-----------------|--------------------|
| <a href="#">warfarin</a> | *1/*2,<br>*1/*1,<br>No info | N/A, N/A, N/A | No Guideline.   | N/A                |

**CONTACT**

 National Biobank of Thailand (NBT)

 Tel : 025647000 Ext. 71475

 Email : nbt@nstda.or.th

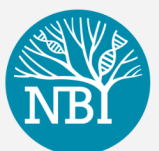

CYP2D6

| Drug name                   | Diplotype | Phenotype        | Recommendations                                                                                                                                                                                                                                                                                                                                                                                                                                                                                                                                                                                                                                                                                                                                                                                                                                                                                                                                                                                                                                                       | Guideline strength |
|-----------------------------|-----------|------------------|-----------------------------------------------------------------------------------------------------------------------------------------------------------------------------------------------------------------------------------------------------------------------------------------------------------------------------------------------------------------------------------------------------------------------------------------------------------------------------------------------------------------------------------------------------------------------------------------------------------------------------------------------------------------------------------------------------------------------------------------------------------------------------------------------------------------------------------------------------------------------------------------------------------------------------------------------------------------------------------------------------------------------------------------------------------------------|--------------------|
| <a href="#">atomoxetine</a> | *3/*4     | Poor Metabolizer | <p><b>Children:</b></p> <p>Initiate with a dose of 0.5 mg/kg/day and if no clinical response and in the absence of adverse events after 2 weeks, consider obtaining a plasma concentration 4 h after dosing. If response is inadequate and concentration is &lt;200 ng/ml, consider a proportional dose increase to achieve a concentration to approach 400 ng/ml. If unacceptable side effects are present at any time, consider a reduction in dose.</p> <p><b>Strength of recommendation:</b><br/>Strong</p> <p><b>Adults:</b></p> <p>Initiate with a dose of 40 mg/day and if no clinical response and in the absence of adverse events after 2 weeks increase dose to 80 mg/day. If response is inadequate after 2 weeks consider obtaining a plasma concentration 2-4 h after dosing. If concentration is &lt;200 ng/ml, consider a proportional dose increase to achieve a concentration to approach 400 ng/ml. If unacceptable side effects are present at any time, consider a reduction in dose.</p> <p><b>Strength of recommendation:</b><br/>Moderate</p> | Moderate           |
| <a href="#">codeine</a>     | *3/*4     | Poor Metabolizer | <p>Avoid codeine use due to lack of efficacy.</p>                                                                                                                                                                                                                                                                                                                                                                                                                                                                                                                                                                                                                                                                                                                                                                                                                                                                                                                                                                                                                     | Strong             |

## CONTACT

 National Biobank of Thailand (NBT)

 Tel : 025647000 Ext. 71475

 Email : nbt@nstda.or.th

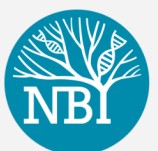

**CYP2D6**

| Drug name                     | Diplotype | Phenotype        | Recommendations                                                                                                                                                                                                                                         | Guideline strength |
|-------------------------------|-----------|------------------|---------------------------------------------------------------------------------------------------------------------------------------------------------------------------------------------------------------------------------------------------------|--------------------|
| <a href="#">desipramine</a>   | *3/*4     | Poor Metabolizer | Avoid tricyclic use due to potential for side effects. Consider alternative drug not metabolized by CYP2D6. If a TCA is warranted, consider 50% reduction of recommended starting dose.g Utilize therapeutic drug monitoring to guide dose adjustments. | Optional           |
| <a href="#">fluvoxamine</a>   | *3/*4     | Poor Metabolizer | Consider a 25-50% reduction of recommended starting dose and titrate to response or use an alternative drug not metabolized by CYP2D6.                                                                                                                  | Optional           |
| <a href="#">nortriptyline</a> | *3/*4     | Poor Metabolizer | Avoid tricyclic use due to potential for side effects. Consider alternative drug not metabolized by CYP2D6. If a TCA is warranted, consider 50% reduction of recommended starting dose.g Utilize therapeutic drug monitoring to guide dose adjustments. | Strong             |
| <a href="#">ondansetron</a>   | *3/*4     | Poor Metabolizer | Insufficient evidence demonstrating clinical impact based on CYP2D6 genotype. Initiate therapy with recommended starting dose.                                                                                                                          | No recommendation  |
| <a href="#">paroxetine</a>    | *3/*4     | Poor Metabolizer | Select alternative drug not predominantly metabolized by CYP2D6 or if paroxetine use warranted, consider a 50% reduction of recommended starting dose and titrate to response.                                                                          | Optional           |

**CONTACT**

 National Biobank of Thailand (NBT)

 Tel : 025647000 Ext. 71475

 Email : nbt@nstda.or.th

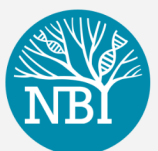

**CYP2D6**

| Drug name                   | Diplotype | Phenotype        | Recommendations                                                                                                                                                                                                                                                                                                                                                                                                                                                                                                                                                                                                                                                                                                                                                                 | Guideline strength |
|-----------------------------|-----------|------------------|---------------------------------------------------------------------------------------------------------------------------------------------------------------------------------------------------------------------------------------------------------------------------------------------------------------------------------------------------------------------------------------------------------------------------------------------------------------------------------------------------------------------------------------------------------------------------------------------------------------------------------------------------------------------------------------------------------------------------------------------------------------------------------|--------------------|
| <a href="#">tamoxifen</a>   | *3/*4     | Poor Metabolizer | Recommend alternative hormonal therapy such as an aromatase inhibitor for postmenopausal women or aromatase inhibitor along with ovarian function suppression in premenopausal women given that these approaches are superior to tamoxifen regardless of CYP2D6 genotype [Articles: <a href="#">26211827</a> , <a href="#">24881463</a> ] and based on knowledge that CYP2D6 poor metabolizers switched from tamoxifen to anastrozole do not have an increased risk of recurrence [Article: <a href="#">23213055</a> ]. Note, higher dose tamoxifen (40 mg/day) increases but does not normalize endoxifen concentrations and can be considered if there are contraindications to aromatase inhibitor therapy [Articles: <a href="#">27226358</a> , <a href="#">21768473</a> ]. | Strong             |
| <a href="#">tropisetron</a> | *3/*4     | Poor Metabolizer | Insufficient evidence demonstrating clinical impact based on CYP2D6 genotype. Initiate therapy with recommended starting dose.                                                                                                                                                                                                                                                                                                                                                                                                                                                                                                                                                                                                                                                  | No recommendation  |

**CYP3A5**

| Drug name                  | Diplotype | Phenotype        | Recommendations                                                                                             | Guideline strength |
|----------------------------|-----------|------------------|-------------------------------------------------------------------------------------------------------------|--------------------|
| <a href="#">tacrolimus</a> | *3/*3     | Poor Metabolizer | Initiate therapy with standard recommended dose. Use therapeutic drug monitoring to guide dose adjustments. | Strong             |

**CONTACT**

 National Biobank of Thailand (NBT)

 Tel : 025647000 Ext. 71475

 Email : [nbt@nstda.or.th](mailto:nbt@nstda.or.th)



**DPYD**

| Drug name                    | Diplotype                                                                       | Phenotype          | Recommendations                                                                                                       | Guideline strength |
|------------------------------|---------------------------------------------------------------------------------|--------------------|-----------------------------------------------------------------------------------------------------------------------|--------------------|
| <a href="#">capecitabine</a> | No CPIC decreased or no function variant with strong or moderate evidence found | Normal Metabolizer | Based on genotype, there is no indication to change dose or therapy. Use label-recommended dosage and administration. | Strong             |
| <a href="#">fluorouracil</a> | No CPIC decreased or no function variant with strong or moderate evidence found | Normal Metabolizer | Based on genotype, there is no indication to change dose or therapy. Use label-recommended dosage and administration. | Strong             |

**G6PD**

| Drug name                   | Diplotype                 | Phenotype | Recommendations                                         | Guideline strength |
|-----------------------------|---------------------------|-----------|---------------------------------------------------------|--------------------|
| <a href="#">rasburicase</a> | B (wildtype)/B (wildtype) | N/A       | No reason to withhold rasburicase based on G6PD status. | Strong             |

**IFNL3**

| Drug name                                                                                                       | Diplotype | Phenotype | Recommendations | Guideline strength |
|-----------------------------------------------------------------------------------------------------------------|-----------|-----------|-----------------|--------------------|
| <a href="#">peginterferon-alfa-2a</a> ,<br><a href="#">peginterferon-alfa-2b</a> ,<br><a href="#">ribavirin</a> | No info   | N/A       | No Guideline.   | N/A                |

**NUDT15, TPMT**

| Drug name                                                        | Diplotype       | Phenotype | Recommendations | Guideline strength |
|------------------------------------------------------------------|-----------------|-----------|-----------------|--------------------|
| <a href="#">azathioprine</a> ,<br><a href="#">mercaptopurine</a> | *1/*1,<br>*1/*1 | N/A, N/A  | No Guideline.   | N/A                |

**SLCO1B1**

| Drug name                   | Diplotype             | Phenotype | Recommendations                                                                                                                                  | Guideline strength |
|-----------------------------|-----------------------|-----------|--------------------------------------------------------------------------------------------------------------------------------------------------|--------------------|
| <a href="#">simvastatin</a> | rs4149056C/rs4149056T | N/A       | Prescribe a lower dose or consider an alternative statin (e.g., pravastatin or rosuvastatin); consider routine creatine kinase (CK) surveillance | Strong             |

**UGT1A1**

| Drug name                  | Diplotype | Phenotype          | Recommendations                                                                                 | Guideline strength |
|----------------------------|-----------|--------------------|-------------------------------------------------------------------------------------------------|--------------------|
| <a href="#">atazanavir</a> | *1/*1     | Normal Metabolizer | There is no need to avoid prescribing of atazanavir based on <i>UGT1A1</i> genetic test result. | Strong             |

**CONTACT**

 National Biobank of Thailand (NBT)

 Tel : 025647000 Ext. 71475

 Email : nbt@nstda.or.th



## Summary: HLA

## Related CPIC guideline(s)

CYP2C9, HLA-B

| Drug name                 | Diplotype             | Recommendations                                                                                                                                                                                                        | Guideline strength |
|---------------------------|-----------------------|------------------------------------------------------------------------------------------------------------------------------------------------------------------------------------------------------------------------|--------------------|
| <a href="#">phenytoin</a> | *1/*2,<br>Other/Other | Consider 25% reduction of recommended starting maintenance dosed (based on patient's clinical characteristics). Subsequent maintenance doses should be adjusted according to therapeutic drug monitoring and response. | Moderate           |

HLA-A, HLA-B

| Drug name                     | Diplotype                   | Recommendations                                  | Guideline strength |
|-------------------------------|-----------------------------|--------------------------------------------------|--------------------|
| <a href="#">carbamazepine</a> | Other/Other,<br>Other/Other | Use carbamazepine per standard dosing guidelines | Strong             |

HLA-B

| Drug name                     | Diplotype   | Recommendations                                  | Guideline strength |
|-------------------------------|-------------|--------------------------------------------------|--------------------|
| <a href="#">abacavir</a>      | Other/Other | Use abacavir per standard dosing guidelines      | Strong             |
| <a href="#">allopurinol</a>   | Other/Other | Use allopurinol per standard dosing guidelines.  | Strong             |
| <a href="#">oxcarbazepine</a> | Other/Other | Use oxcarbazepine per standard dosing guidelines | Strong             |

## CONTACT

 National Biobank of Thailand (NBT) Tel : 025647000 Ext. 71475 Email : nbt@nstda.or.th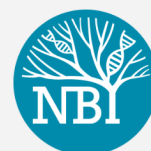



## Related publication(s) for HLA-ADR association

## HLA-A\*01 (No. of detecting tools = 3/3)

| Drug name | ADR             | Patient disease | Cohort ethnicity | No. of pub.(s) |
|-----------|-----------------|-----------------|------------------|----------------|
| Clozapine | agranulocytosis | Schizophrenia   | Caucasian        | 1              |

## HLA-A\*01:01 (No. of detecting tools = 3/3)

| Drug name                                    | ADR                                                                                                                                                             | Patient disease      | Cohort ethnicity | No. of pub.(s) |
|----------------------------------------------|-----------------------------------------------------------------------------------------------------------------------------------------------------------------|----------------------|------------------|----------------|
| Amoxicillin-clavulanate                      | drug induced liver injury (DILI)                                                                                                                                | Bacterial infections | Caucasian        | 2              |
| Antibacterial drugs                          | Stevens–Johnson syndrome (SJS),toxic epidermal necrolysis (TEN),drug-induced hypersensitivity syndrome (DIHS),acute generalized exanthematous pustulosis (AGEP) | Bacterial infections | Unknown          | 2              |
| Antiepileptic drugs                          | Stevens-Johnson syndrome (SJS),toxic epidermal necrolysis (TEN)                                                                                                 | Epilepsy             | Han Chinese      | 1              |
| Antiepileptic drugs                          | Stevens–Johnson syndrome (SJS),toxic epidermal necrolysis (TEN),drug-induced hypersensitivity syndrome (DIHS),acute generalized exanthematous pustulosis (AGEP) | Epilepsy             | Unknown          | 1              |
| Carbamazepine                                | Stevens-Johnson syndrome (SJS),toxic epidermal necrolysis (TEN),drug-induced hypersensitivity syndrome (DIHS)                                                   | Epilepsy             | Japanese         | 1              |
| Carbamazepine                                | Stevens-Johnson syndrome (SJS),toxic epidermal necrolysis (TEN)                                                                                                 | Epilepsy             | Han Chinese      | 2              |
| Carbamazepine                                | Stevens-Johnson syndrome (SJS),toxic epidermal necrolysis (TEN)                                                                                                 | Epilepsy             | European         | 2              |
| EGF receptor inhibitors                      | maculopapular exanthema (MPE)                                                                                                                                   | Cancer               | Unknown          | 1              |
| Lamotrigine                                  | Stevens–Johnson syndrome (SJS),toxic epidermal necrolysis (TEN)                                                                                                 | Epilepsy             | Caucasian        | 1              |
| Lamotrigine                                  | drug-induced hypersensitivity syndrome (DIHS)                                                                                                                   | Epilepsy             | Caucasian        | 1              |
| Levetiracetam                                | maculopapular eruption (MPE)                                                                                                                                    | Epilepsy             | Indian           | 1              |
| NSAID and 'multi-ingredient cold medication' | Stevens-Johnson syndrome (SJS),toxic epidermal necrolysis (TEN),severe ocular complications                                                                     | Common cold          | Diverse          | 1              |

## HLA-A\*11 (No. of detecting tools = 3/3)

| Drug name         | ADR                          | Patient disease | Cohort ethnicity | No. of pub.(s) |
|-------------------|------------------------------|-----------------|------------------|----------------|
| Tetanus antitoxin | maculopapular eruption (MPE) | Tetanus         | Han Chinese      | 1              |

## CONTACT

 National Biobank of Thailand (NBT)

 Tel : 025647000 Ext. 71475

 Email : nbt@nstda.or.th

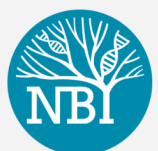

## HLA-A\*11:01 (No. of detecting tools = 2/3)

| Drug name                                    | ADR                                                                                                                                                             | Patient disease      | Cohort ethnicity | No. of pub.(s) |
|----------------------------------------------|-----------------------------------------------------------------------------------------------------------------------------------------------------------------|----------------------|------------------|----------------|
| Amoxicillin-clavulanate                      | drug induced liver injury (DILI)                                                                                                                                | Bacterial infections | Caucasian        | 2              |
| Antibacterial drugs                          | Stevens–Johnson syndrome (SJS),toxic epidermal necrolysis (TEN),drug-induced hypersensitivity syndrome (DIHS),acute generalized exanthematous pustulosis (AGEP) | Bacterial infections | Unknown          | 2              |
| Antiepileptic drugs                          | Stevens–Johnson syndrome (SJS),toxic epidermal necrolysis (TEN),drug-induced hypersensitivity syndrome (DIHS),acute generalized exanthematous pustulosis (AGEP) | Epilepsy             | Unknown          | 1              |
| Carbamazepine                                | Stevens–Johnson syndrome (SJS),toxic epidermal necrolysis (TEN)                                                                                                 | Epilepsy             | Caucasian        | 1              |
| Carbamazepine                                | Stevens-Johnson syndrome (SJS),toxic epidermal necrolysis (TEN),drug-induced hypersensitivity syndrome (DIHS)                                                   | Epilepsy             | Japanese         | 1              |
| Carbamazepine                                | Stevens-Johnson syndrome (SJS),toxic epidermal necrolysis (TEN)                                                                                                 | Epilepsy             | Han Chinese      | 4              |
| Carbamazepine                                | drug-induced hypersensitivity syndrome (DIHS)                                                                                                                   | Epilepsy             | Han Chinese      | 2              |
| Carbamazepine                                | maculopapular exanthema (MPE)                                                                                                                                   | Epilepsy             | Han Chinese      | 3              |
| Clarithromycin                               | drug-induced skin reaction (DISI)                                                                                                                               | Bacterial infections | Han Chinese      | 1              |
| Lamotrigine                                  | maculopapular exanthema (MPE)                                                                                                                                   | Epilepsy             | Han Chinese      | 1              |
| Lamotrigine                                  | Stevens–Johnson syndrome (SJS),toxic epidermal necrolysis (TEN)                                                                                                 | Epilepsy             | Caucasian        | 1              |
| Levetiracetam                                | maculopapular eruption (MPE)                                                                                                                                    | Epilepsy             | Indian           | 1              |
| NSAID and 'multi-ingredient cold medication' | Stevens-Johnson syndrome (SJS),toxic epidermal necrolysis (TEN),severe ocular complications                                                                     | Common cold          | Diverse          | 1              |
| Phenytoin                                    | Stevens–Johnson syndrome (SJS),toxic epidermal necrolysis (TEN)                                                                                                 | Epilepsy             | Caucasian        | 1              |
| Phenytoin                                    | Stevens-Johnson syndrome (SJS),toxic epidermal necrolysis (TEN)                                                                                                 | Epilepsy             | Han Chinese      | 1              |
| Tetanus antitoxin                            | maculopapular eruption (MPE)                                                                                                                                    | Tetanus              | Han Chinese      | 1              |

## CONTACT

 National Biobank of Thailand (NBT)

 Tel : 025647000 Ext. 71475

 Email : nbt@nstda.or.th



## HLA-B\*08:01 (No. of detecting tools = 3/3)

| Drug name                                    | ADR                                                                                                                                                             | Patient disease      | Cohort ethnicity | No. of pub.(s) |
|----------------------------------------------|-----------------------------------------------------------------------------------------------------------------------------------------------------------------|----------------------|------------------|----------------|
| Amoxicillin-clavulanate                      | drug induced liver injury (DILI)                                                                                                                                | Bacterial infections | Caucasian        | 2              |
| Antibacterial drugs                          | Stevens–Johnson syndrome (SJS),toxic epidermal necrolysis (TEN),drug-induced hypersensitivity syndrome (DIHS),acute generalized exanthematous pustulosis (AGEP) | Bacterial infections | Unknown          | 2              |
| Antiepileptic drugs                          | Stevens–Johnson syndrome (SJS),toxic epidermal necrolysis (TEN),drug-induced hypersensitivity syndrome (DIHS),acute generalized exanthematous pustulosis (AGEP) | Epilepsy             | Unknown          | 1              |
| Carbamazepine                                | Stevens-Johnson syndrome (SJS),toxic epidermal necrolysis (TEN)                                                                                                 | Epilepsy             | European         | 2              |
| Carbamazepine                                | Stevens-Johnson syndrome (SJS),toxic epidermal necrolysis (TEN),drug-induced hypersensitivity syndrome (DIHS)                                                   | Epilepsy             | Vietnamese       | 1              |
| EGF receptor inhibitors                      | maculopapular exanthema (MPE)                                                                                                                                   | Cancer               | Unknown          | 1              |
| Lamotrigine                                  | drug-induced hypersensitivity syndrome (DIHS)                                                                                                                   | Epilepsy             | Caucasian        | 1              |
| NSAID and 'multi-ingredient cold medication' | Stevens-Johnson syndrome (SJS),toxic epidermal necrolysis (TEN),severe ocular complications                                                                     | Common cold          | Diverse          | 1              |
| Phenytoin                                    | Stevens–Johnson syndrome (SJS),toxic epidermal necrolysis (TEN)                                                                                                 | Epilepsy             | Caucasian        | 1              |

## HLA-B\*56:01 (No. of detecting tools = 3/3)

| Drug name               | ADR                                                                                                                                                             | Patient disease      | Cohort ethnicity | No. of pub.(s) |
|-------------------------|-----------------------------------------------------------------------------------------------------------------------------------------------------------------|----------------------|------------------|----------------|
| Amoxicillin-clavulanate | drug induced liver injury (DILI)                                                                                                                                | Bacterial infections | Caucasian        | 2              |
| Antibacterial drugs     | Stevens–Johnson syndrome (SJS),toxic epidermal necrolysis (TEN),drug-induced hypersensitivity syndrome (DIHS),acute generalized exanthematous pustulosis (AGEP) | Bacterial infections | Unknown          | 2              |
| Antiepileptic drugs     | Stevens–Johnson syndrome (SJS),toxic epidermal necrolysis (TEN),drug-induced hypersensitivity syndrome (DIHS),acute generalized exanthematous pustulosis (AGEP) | Epilepsy             | Unknown          | 1              |
| Carbamazepine           | Stevens-Johnson syndrome (SJS),toxic epidermal necrolysis (TEN)                                                                                                 | Epilepsy             | Thai             | 1              |

## CONTACT

 National Biobank of Thailand (NBT)

 Tel : 025647000 Ext. 71475

 Email : nbt@nstda.or.th



## HLA-B\*56:01 (No. of detecting tools = 3/3)

| Drug name                                    | ADR                                                                                                                                         | Patient disease | Cohort ethnicity | No. of pub.(s) |
|----------------------------------------------|---------------------------------------------------------------------------------------------------------------------------------------------|-----------------|------------------|----------------|
| Carbamazepine                                | Stevens-Johnson syndrome (SJS),toxic epidermal necrolysis (TEN),drug-induced hypersensitivity syndrome (DIHS),maculopapular exanthema (MPE) | Epilepsy        | Japanese         | 1              |
| Carbamazepine                                | Stevens-Johnson syndrome (SJS),toxic epidermal necrolysis (TEN)                                                                             | Epilepsy        | Han Chinese      | 1              |
| NSAID and 'multi-ingredient cold medication' | Stevens-Johnson syndrome (SJS),toxic epidermal necrolysis (TEN),severe ocular complications                                                 | Common cold     | Diverse          | 1              |
| Oxcarbazepine                                | maculopapular exanthema (MPE)                                                                                                               | Epilepsy        | Han Chinese      | 1              |
| Phenytoin                                    | Stevens-Johnson syndrome (SJS),toxic epidermal necrolysis (TEN)                                                                             | Epilepsy        | Han Chinese      | 1              |

## HLA-C\*01:02 (No. of detecting tools = 3/3)

| Drug name                                    | ADR                                                                                         | Patient disease      | Cohort ethnicity | No. of pub.(s) |
|----------------------------------------------|---------------------------------------------------------------------------------------------|----------------------|------------------|----------------|
| Carbamazepine                                | drug-induced hypersensitivity syndrome (DIHS)                                               | Epilepsy             | Han Chinese      | 1              |
| Carbamazepine                                | maculopapular exanthema (MPE)                                                               | Epilepsy             | Han Chinese      | 1              |
| Carbamazepine                                | Stevens-Johnson syndrome (SJS)                                                              | Epilepsy             | Korean           | 1              |
| Carbamazepine                                | drug-induced hypersensitivity syndrome (DIHS)                                               | Epilepsy             | Korean           | 1              |
| Carbamazepine                                | drug-induced skin reaction (DISI)                                                           | Epilepsy             | Korean           | 1              |
| Carbamazepine                                | Stevens-Johnson syndrome (SJS),toxic epidermal necrolysis (TEN)                             | Epilepsy             | Han Chinese      | 1              |
| Clarithromycin                               | drug-induced skin reaction (DISI)                                                           | Bacterial infections | Han Chinese      | 1              |
| Lamotrigine                                  | maculopapular eruption (MPE)                                                                | Epilepsy             | Korean           | 1              |
| NSAID and 'multi-ingredient cold medication' | Stevens-Johnson syndrome (SJS),toxic epidermal necrolysis (TEN),severe ocular complications | Common cold          | Diverse          | 1              |
| Phenytoin                                    | Stevens-Johnson syndrome (SJS),toxic epidermal necrolysis (TEN)                             | Epilepsy             | Han Chinese      | 1              |
| Tetanus antitoxin                            | maculopapular eruption (MPE)                                                                | Tetanus              | Han Chinese      | 1              |

## HLA-C\*07 (No. of detecting tools = 3/3)

| Drug name | ADR             | Patient disease | Cohort ethnicity | No. of pub.(s) |
|-----------|-----------------|-----------------|------------------|----------------|
| Clozapine | agranulocytosis | Schizophrenia   | Caucasian        | 1              |

## CONTACT

 National Biobank of Thailand (NBT)

 Tel : 025647000 Ext. 71475

 Email : nbt@nstda.or.th



**HLA-C\*07:01 (No. of detecting tools = 3/3)**

| Drug name                                    | ADR                                                                                         | Patient disease | Cohort ethnicity | No. of pub.(s) |
|----------------------------------------------|---------------------------------------------------------------------------------------------|-----------------|------------------|----------------|
| EGF receptor inhibitors                      | maculopapular exanthema (MPE)                                                               | Cancer          | Unknown          | 1              |
| Lamotrigine                                  | Stevens–Johnson syndrome (SJS),toxic epidermal necrolysis (TEN)                             | Epilepsy        | Caucasian        | 1              |
| Lamotrigine                                  | drug-induced hypersensitivity syndrome (DIHS)                                               | Epilepsy        | Caucasian        | 1              |
| Lamotrigine                                  | maculopapular eruption (MPE)                                                                | Epilepsy        | Korean           | 1              |
| NSAID and 'multi-ingredient cold medication' | Stevens-Johnson syndrome (SJS),toxic epidermal necrolysis (TEN),severe ocular complications | Common cold     | Diverse          | 1              |
| Phenytoin                                    | Stevens–Johnson syndrome (SJS),toxic epidermal necrolysis (TEN)                             | Epilepsy        | Caucasian        | 1              |
| Phenytoin                                    | drug-induced hypersensitivity syndrome (DIHS)                                               | Epilepsy        | Caucasian        | 1              |

**HLA-DPB1\*04:01 (No. of detecting tools = 3/3)**

| Drug name   | ADR                             | Patient disease      | Cohort ethnicity | No. of pub.(s) |
|-------------|---------------------------------|----------------------|------------------|----------------|
| Bucillamine | bucillamine-induced proteinuria | Rheumatoid arthritis | Japanese         | 1              |

**HLA-DPB1\*14:01 (No. of detecting tools = 3/3)**

| Drug name   | ADR                             | Patient disease      | Cohort ethnicity | No. of pub.(s) |
|-------------|---------------------------------|----------------------|------------------|----------------|
| Bucillamine | bucillamine-induced proteinuria | Rheumatoid arthritis | Japanese         | 1              |

**HLA-DQA1\*01:01 (No. of detecting tools = 3/3)**

| Drug name               | ADR                              | Patient disease      | Cohort ethnicity | No. of pub.(s) |
|-------------------------|----------------------------------|----------------------|------------------|----------------|
| Amoxicillin-clavulanate | drug induced liver injury (DILI) | Bacterial infections | Caucasian        | 2              |

**HLA-DQA1\*05:01 (No. of detecting tools = 3/3)**

| Drug name               | ADR                              | Patient disease      | Cohort ethnicity | No. of pub.(s) |
|-------------------------|----------------------------------|----------------------|------------------|----------------|
| Amoxicillin-clavulanate | drug induced liver injury (DILI) | Bacterial infections | Caucasian        | 2              |

**HLA-DQB1\*02:01 (No. of detecting tools = 3/3)**

| Drug name               | ADR                              | Patient disease      | Cohort ethnicity | No. of pub.(s) |
|-------------------------|----------------------------------|----------------------|------------------|----------------|
| Amoxicillin-clavulanate | drug induced liver injury (DILI) | Bacterial infections | Caucasian        | 2              |
| Clozapine               | agranulocytosis                  | Schizophrenia        | Caucasian        | 1              |

**CONTACT**

 National Biobank of Thailand (NBT)

 Tel : 025647000 Ext. 71475

 Email : nbt@nstda.or.th



## HLA-DQB1\*05:01 (No. of detecting tools = 3/3)

| Drug name               | ADR                              | Patient disease      | Cohort ethnicity | No. of pub.(s) |
|-------------------------|----------------------------------|----------------------|------------------|----------------|
| Amoxicillin-clavulanate | drug induced liver injury (DILI) | Bacterial infections | Caucasian        | 2              |
| Bucillamine             | bucillamine-induced proteinuria  | Rheumatoid arthritis | Japanese         | 1              |
| Oxcarbazepine           | maculopapular exanthema (MPE)    | Epilepsy             | Korean           | 1              |

## HLA-DRB1\*01 (No. of detecting tools = 3/3)

| Drug name      | ADR                              | Patient disease      | Cohort ethnicity | No. of pub.(s) |
|----------------|----------------------------------|----------------------|------------------|----------------|
| Flucloxacillin | drug induced liver injury (DILI) | Bacterial infections | Caucasian        | 1              |

## HLA-DRB1\*01:01 (No. of detecting tools = 3/3)

| Drug name               | ADR                                                                | Patient disease      | Cohort ethnicity | No. of pub.(s) |
|-------------------------|--------------------------------------------------------------------|----------------------|------------------|----------------|
| Amoxicillin-clavulanate | drug induced liver injury (DILI)                                   | Bacterial infections | Caucasian        | 2              |
| Antiepileptic drugs     | Stevens-Johnson syndrome (SJS),toxic epidermal necrolysis (TEN)    | Epilepsy             | Han Chinese      | 1              |
| Bucillamine             | bucillamine-induced proteinuria                                    | Rheumatoid arthritis | Japanese         | 1              |
| Carbamazepine           | maculopapular exanthema (MPE)                                      | Epilepsy             | Han Chinese      | 1              |
| Carbamazepine           | Stevens-Johnson syndrome (SJS),toxic epidermal necrolysis (TEN)    | Epilepsy             | Han Chinese      | 1              |
| Clozapine               | agranulocytosis                                                    | Schizophrenia        | Caucasian        | 1              |
| Co-trimoxazole          | maculopapular exanthema (MPE),Stevens-Johnson syndrome (SJS)       | HIV                  | Caucasian        | 1              |
| EGF receptor inhibitors | maculopapular exanthema (MPE)                                      | Cancer               | Unknown          | 1              |
| Nevirapine              | drug-induced hypersensitivity syndrome (DIHS)                      | HIV                  | Diverse          | 1              |
| Nevirapine              | drug-induced skin reaction (DISI),drug induced liver injury (DILI) | HIV                  | Caucasian        | 1              |

## HLA-DRB1\*03 (No. of detecting tools = 3/3)

| Drug name      | ADR                              | Patient disease      | Cohort ethnicity | No. of pub.(s) |
|----------------|----------------------------------|----------------------|------------------|----------------|
| Flucloxacillin | drug induced liver injury (DILI) | Bacterial infections | Caucasian        | 1              |

## CONTACT

 National Biobank of Thailand (NBT)

 Tel : 025647000 Ext. 71475

 Email : nbt@nstda.or.th

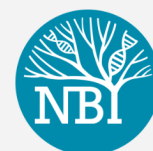

## HLA-DRB1\*03:01 (No. of detecting tools = 3/3)

| Drug name               | ADR                                                                                                           | Patient disease      | Cohort ethnicity | No. of pub.(s) |
|-------------------------|---------------------------------------------------------------------------------------------------------------|----------------------|------------------|----------------|
| Allopurinol             | Stevens-Johnson syndrome (SJS),toxic epidermal necrolysis (TEN),drug-induced hypersensitivity syndrome (DIHS) | Gout                 | Han Chinese      | 1              |
| Amoxicillin-clavulanate | drug induced liver injury (DILI)                                                                              | Bacterial infections | Caucasian        | 2              |
| Carbamazepine           | maculopapular exanthema (MPE)                                                                                 | Epilepsy             | Han Chinese      | 1              |
| Clozapine               | agranulocytosis                                                                                               | Schizophrenia        | Caucasian        | 1              |
| Co-trimoxazole          | maculopapular exanthema (MPE),Stevens-Johnson syndrome (SJS)                                                  | HIV                  | Caucasian        | 1              |
| Nevirapine              | drug-induced hypersensitivity syndrome (DIHS)                                                                 | HIV                  | Diverse          | 1              |
| Phenytoin               | Stevens-Johnson syndrome (SJS),toxic epidermal necrolysis (TEN)                                               | Epilepsy             | Han Chinese      | 1              |

## HLA-DRB3\*01:01 (No. of detecting tools = 3/3)

| Drug name | ADR             | Patient disease | Cohort ethnicity | No. of pub.(s) |
|-----------|-----------------|-----------------|------------------|----------------|
| Clozapine | agranulocytosis | Schizophrenia   | Caucasian        | 1              |

## CONTACT

 National Biobank of Thailand (NBT)

 Tel : 025647000 Ext. 71475

 Email : nbt@nstda.or.th



## Summary: PGx genes

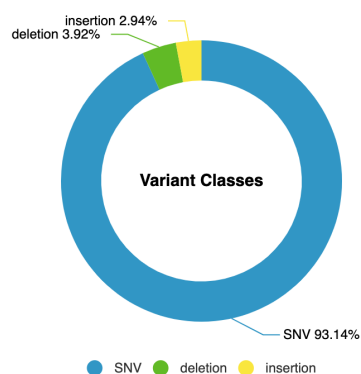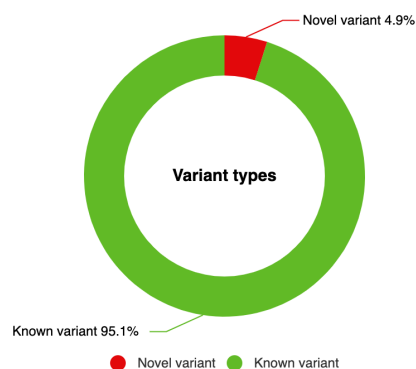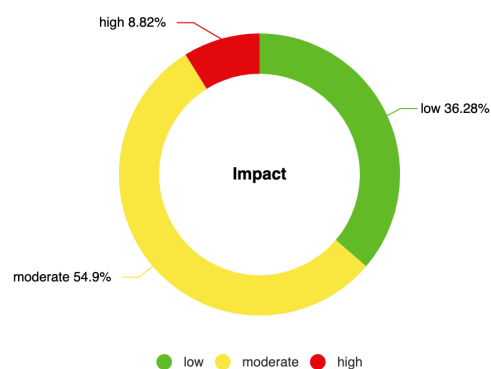

Number of variants categorized by classes

| Variant classes | # variants |
|-----------------|------------|
| SNV             | 95         |
| deletion        | 4          |
| insertion       | 3          |

Number of variants categorized by types

| Type            | # variants |
|-----------------|------------|
| Novel variation | 5          |
| Known variant   | 97         |

Number of transcripts categorized by variant impacts

| Impacts  | # transcripts |
|----------|---------------|
| low      | 37            |
| moderate | 56            |
| high     | 9             |

## CONTACT

 National Biobank of Thailand (NBT)

 Tel : 025647000 Ext. 71475

 Email : nbt@nstda.or.th





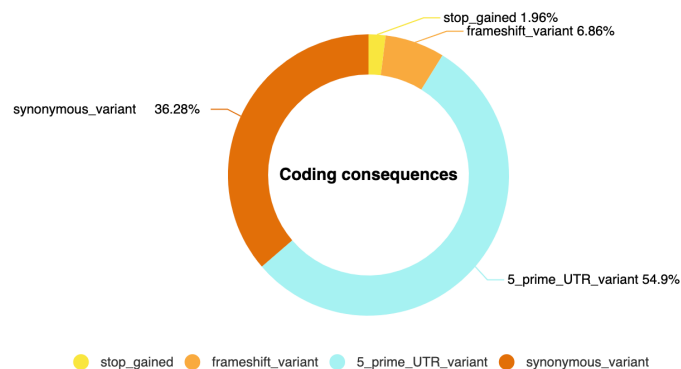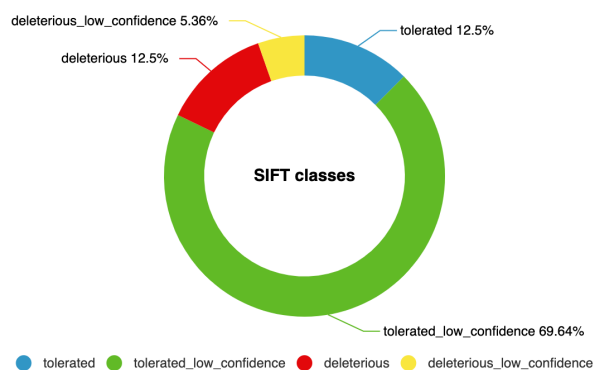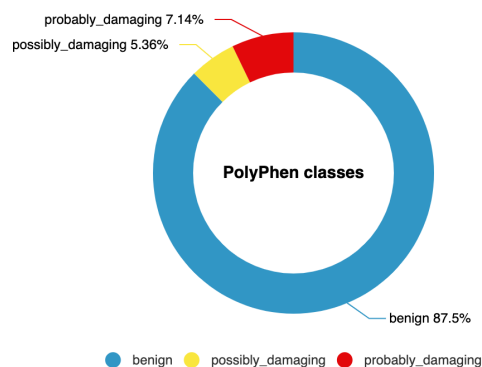

## Number of transcripts categorized by coding consequences

| Coding consequences   | # transcripts |
|-----------------------|---------------|
| Stop gained           | 2             |
| Frameshift variant    | 7             |
| Missense variant      | 56            |
| Splice region variant | 5             |
| Synonymous variant    | 37            |

## Number of transcripts categorized by SIFT classes

| SIFT classes               | # transcripts |
|----------------------------|---------------|
| tolerated                  | 7             |
| tolerated_low_confidence   | 39            |
| deleterious                | 7             |
| deleterious_low_confidence | 3             |

## Number of transcripts categorized by PolyPhen classes

| PolyPhen classes  | # transcripts |
|-------------------|---------------|
| benign            | 49            |
| possibly_damaging | 3             |
| probably_damaging | 4             |

## CONTACT

 National Biobank of Thailand (NBT)

 Tel : 025647000 Ext. 71475

 Email : nbt@nstda.or.th



**DISCLAIMER:**

PharmVIP platform is currently provided for research and informational purposes only and is not intended to diagnose, treat, cure, or prevent any disease. The report generated by the platform is not meant to be a substitute for professional medical advice, diagnosis, or treatment provided by a physician or other qualified health care professional. Only a physician, pharmacist or other healthcare professional should advise a patient on the use of the medications prescribed. Any application of the content provided or obtained through the use of the platform is therefore solely at the user's own risk and responsibility.

**CONTACT**

 National Biobank of Thailand (NBT)

 Tel : 025647000 Ext. 71475

 Email : [nbt@nstda.or.th](mailto:nbt@nstda.or.th)



Supplement: s1 [file s1]
